# Supplementary material for: On the use of a volume constraint to account for thermal expansion effects on the low-frequency vibrations of molecular crystals
Source: Royal Society of Chemistry journal article supplement (doi:10.1039/d1cp05718a), 2022-01-01
Supplement: d1cp05718a1.pdf [file d1cp05718a1.pdf]

*Supplementary information for*

**On the Use of a Volume Constraint to Account for Thermal  
Expansion Effects on the Low-Frequency Vibrations of  
Molecular Crystals**

Fergus J.M. Rogers<sup>\*a</sup>, Krunal Radhanpura<sup>b</sup>, Joseph Horvat<sup>c</sup>, and David Farrant<sup>\*b</sup>

<sup>a</sup> Research School of Chemistry, Australian National University, Canberra, Australian Capital Territory 0200, Australia

<sup>b</sup> Commonwealth Scientific and Industrial Research Organisation (CSIRO), Lindfield, NSW 2070, Australia

<sup>c</sup> School of Physics and Institute for Superconducting and Electronic Materials, University of Wollongong, Wollongong, Australia, NSW, 2522

*Table of Contents*

|                                                                                                  |     |
|--------------------------------------------------------------------------------------------------|-----|
| Appendix S1 Comparison of the $\alpha$ and $\beta$ Spectra of Para-Aminobenzoic acid (PABA)..... | S2  |
| Appendix S2 Fitting of Experimental Modes 3 and 4 in L-Tartaric acid .....                       | S3  |
| Appendix S3 Complete Tables and Charts of Errors.....                                            | S4  |
| Appendix S4 Average Simulated Spectrum – Scaled.....                                             | S11 |
| Appendix S5 Complete List of Raw Simulated Spectra.....                                          | S12 |
| Appendix S6 THz Vibrational Modes of Para-Aminobenzoic acid (PABA) .....                         | S20 |

## Appendix S1 Comparison of the $\alpha$ and $\beta$ Spectra of Para-Aminobenzoic acid (PABA)

Taking the crystal structure submitted by Gracin and Fischer (Fig. S1), the THz absorption spectrum of  $\beta$ -PABA was simulated using the PBE-D3(BJ)/6-311G(2d,2p) method for comparison with  $\alpha$ -PABA. Irrespective of whether a volume constraint was applied, the spectral profile of  $\beta$ -PABA was clearly at odds with the experimental spectrum (Fig. S2).

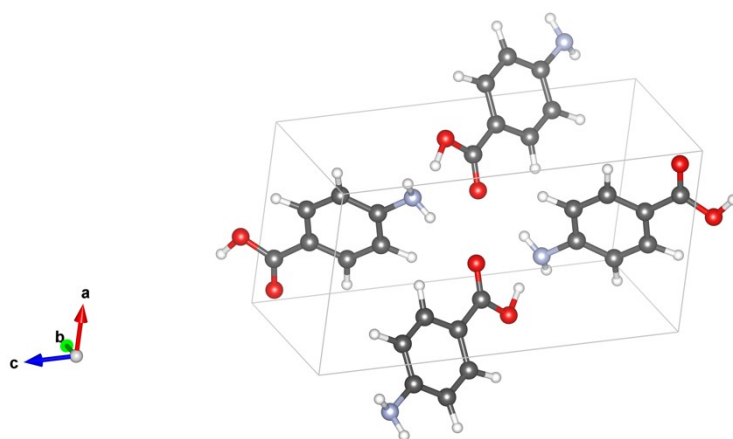

Fig. S1 Crystal structure of  $\beta$ -PABA submitted by Gracin and Fischer.<sup>1</sup>

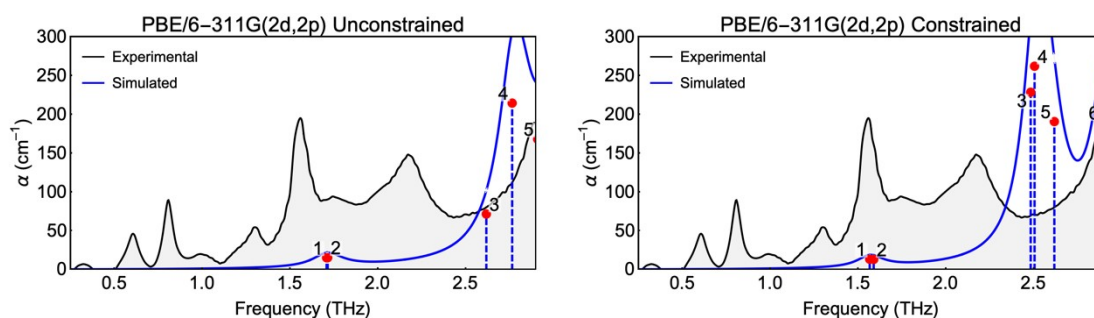

Fig. S2 Absorption spectrum of  $\beta$ -PABA plotted assuming a FWHM of  $6 \text{ cm}^{-1}$  compared with the room-temperature THz-TDS spectrum (grey) of the commercial powder.

## Appendix S2 Fitting of Experimental Modes 3 and 4 in L-Tartaric acid

Due to the distorted peak shapes of modes 3 and 4 in L-tartaric acid, we applied a Lorentzian fitting protocol to estimate the central frequencies of these absorption bands.<sup>2,3</sup> In this case, a Lorentzian function was fitted to a selection of data points composing the experimental feature, using Mathematica's "FindFit" function.<sup>4</sup>

$$\text{Lorentzian}(v) = \frac{A}{1 + b(v - v_0)^2}$$

Where  $A$  is the maximum absorption coefficient (set to the experimental value),  $v_0$  is the central frequency to be determined, and  $b$  is a free parameter.

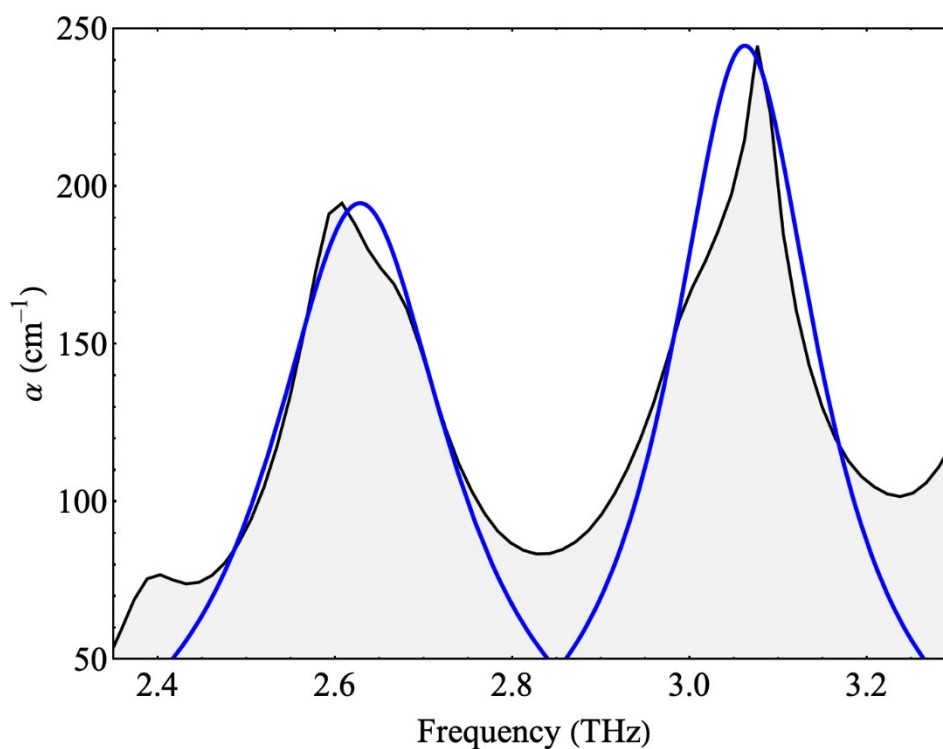

Fig. S3 Lorentzian fits of experimental absorption bands 3 and 4 in L-tartaric acid.

## Appendix S3 Complete Tables and Charts of Errors

**Table S1** Summary of errors (as compared to experiment) for unconstrained simulations of L-tartaric acid.

| Theoretical Method  | Volume (Å <sup>3</sup> ) | A (Å)  | B (Å)  | C (Å)  | Beta (°) | Cell RMSD (%) | Frequency RMSD (THz) | Frequency SD | Scaling Factor |
|---------------------|--------------------------|--------|--------|--------|----------|---------------|----------------------|--------------|----------------|
| BLYP/6-311G(2d,2p)  | -13.703                  | -0.007 | -0.176 | -0.085 | 1.526    | 2.69          | 0.107                | 0.053        | 0.99           |
| PBE/pob-DZVP-rev2   | -15.933                  | -0.055 | -0.207 | -0.075 | 1.069    | 3.05          | 0.124                | 0.065        | 0.97           |
| PBE/6-311G(2d,2p)   | -13.011                  | -0.057 | -0.127 | -0.096 | 0.813    | 2.41          | 0.126                | 0.050        | 1.01           |
| B3LYP/6-311G(2d,2p) | -17.319                  | -0.046 | -0.192 | -0.120 | 1.518    | 3.28          | 0.128                | 0.055        | 0.97           |
| PBE0/pob-DZVP-rev2  | -20.305                  | -0.087 | -0.244 | -0.110 | 1.092    | 3.83          | 0.139                | 0.103        | 0.97           |
| PBE0/6-311G(d,p)    | -17.795                  | -0.090 | -0.162 | -0.137 | 1.065    | 3.29          | 0.157                | 0.060        | 0.97           |
| PBE/6-311G(d,p)     | -13.307                  | -0.058 | -0.130 | -0.096 | 0.925    | 2.47          | 0.158                | 0.082        | 0.97           |
| PBE/pob-TZVP-rev2   | -12.912                  | -0.113 | -0.062 | -0.126 | 0.336    | 2.37          | 0.161                | 0.056        | 0.95           |
| PBE0/pob-TZVP-rev2  | -17.259                  | -0.148 | -0.099 | -0.158 | 0.337    | 3.16          | 0.171                | 0.051        | 0.94           |
| B3LYP/pob-DZVP-rev2 | -20.398                  | -0.048 | -0.310 | -0.066 | 1.383    | 4.05          | 0.173                | 0.120        | 0.97           |
| B3LYP/6-311G(d,p)   | -17.679                  | -0.045 | -0.195 | -0.124 | 1.579    | 3.35          | 0.175                | 0.065        | 0.94           |
| BLYP/6-311G(d,p)    | -14.057                  | -0.007 | -0.181 | -0.085 | 1.618    | 2.76          | 0.180                | 0.108        | 0.94           |
| BLYP/pob-DZVP-rev2  | -16.801                  | -0.010 | -0.273 | -0.047 | 1.677    | 3.44          | 0.181                | 0.164        | 1.00           |
| B3LYP/pob-TZVP-rev2 | -17.703                  | -0.098 | -0.148 | -0.145 | 0.987    | 3.26          | 0.198                | 0.056        | 0.94           |
| BLYP/pob-TZVP-rev2  | -14.184                  | -0.056 | -0.131 | -0.113 | 1.111    | 2.64          | 0.204                | 0.078        | 0.94           |
| PBE0/6-31G(d,p)     | -24.488                  | -0.126 | -0.242 | -0.169 | 1.541    | 4.54          | 0.215                | 0.080        | 0.92           |
| PBE/6-31G(d,p)      | -21.296                  | -0.096 | -0.223 | -0.142 | 1.375    | 3.97          | 0.231                | 0.126        | 0.91           |
| B3LYP/6-31G(d,p)    | -24.610                  | -0.084 | -0.275 | -0.160 | 1.965    | 4.65          | 0.267                | 0.119        | 0.89           |
| BLYP/6-31G(d,p)     | -22.180                  | -0.050 | -0.268 | -0.137 | 2.005    | 4.25          | 0.283                | 0.158        | 0.89           |
| Average             | -17.628                  | -0.067 | -0.192 | -0.115 | 1.259    | 3.34          | 0.178                | 0.087        | 0.95           |

**Table S2** Summary of errors (as compared to experiment) for constrained simulations of L-tartaric acid.

| Theoretical Method  | Volume (Å <sup>3</sup> ) | A (Å)  | B (Å)  | C (Å)  | Beta (°) | Cell RMSD (%) | Frequency RMSD (THz) | Frequency SD | Scaling Factor |
|---------------------|--------------------------|--------|--------|--------|----------|---------------|----------------------|--------------|----------------|
| PBE/pob-TZVP-rev2   | -0.417                   | -0.079 | 0.112  | -0.070 | -0.577   | 1.11          | 0.038                | 0.020        | 0.99           |
| B3LYP/pob-TZVP-rev2 | -0.328                   | -0.052 | 0.094  | -0.066 | -0.201   | 0.91          | 0.054                | 0.039        | 1.00           |
| BLYP/pob-TZVP-rev2  | -0.293                   | -0.014 | 0.057  | -0.049 | 0.217    | 0.57          | 0.068                | 0.037        | 0.99           |
| B3LYP/6-311G(2d,2p) | -0.335                   | 0.010  | 0.021  | -0.031 | 0.317    | 0.32          | 0.087                | 0.029        | 1.02           |
| PBE0/6-31G(d,p)     | -0.321                   | -0.042 | 0.062  | -0.042 | -0.309   | 0.62          | 0.089                | 0.059        | 1.00           |
| PBE0/6-311G(d,p)    | -0.316                   | -0.040 | 0.070  | -0.050 | -0.174   | 0.68          | 0.091                | 0.066        | 1.00           |
| PBE0/pob-TZVP-rev2  | -0.338                   | -0.109 | 0.139  | -0.078 | -0.930   | 1.40          | 0.099                | 0.079        | 1.01           |
| PBE0/pob-DZVP-rev2  | -0.323                   | -0.027 | 0.015  | -0.008 | -0.391   | 0.27          | 0.104                | 0.064        | 0.99           |
| B3LYP/6-311G(d,p)   | -0.322                   | 0.011  | 0.024  | -0.033 | 0.359    | 0.35          | 0.111                | 0.076        | 0.99           |
| PBE/6-311G(2d,2p)   | -0.359                   | -0.016 | 0.035  | -0.034 | -0.153   | 0.38          | 0.121                | 0.067        | 1.02           |
| PBE/pob-DZVP-rev2   | -0.382                   | -0.003 | -0.018 | 0.011  | -0.107   | 0.17          | 0.125                | 0.081        | 1.00           |
| BLYP/6-311G(2d,2p)  | -0.334                   | 0.042  | -0.013 | -0.014 | 0.645    | 0.40          | 0.130                | 0.048        | 1.03           |
| BLYP/pob-DZVP-rev2  | -0.302                   | 0.051  | -0.073 | 0.040  | 0.533    | 0.72          | 0.133                | 0.103        | 1.02           |
| B3LYP/pob-DZVP-rev2 | -0.344                   | 0.020  | -0.032 | 0.014  | 0.229    | 0.31          | 0.137                | 0.115        | 1.01           |
| B3LYP/6-31G(d,p)    | -0.326                   | 0.011  | 0.014  | -0.026 | 0.251    | 0.26          | 0.139                | 0.097        | 0.98           |

|                  |        |        |        |        |        |      |       |       |      |
|------------------|--------|--------|--------|--------|--------|------|-------|-------|------|
| BLYP/6-311G(d,p) | -0.332 | 0.043  | -0.015 | -0.012 | 0.700  | 0.43 | 0.157 | 0.095 | 0.99 |
| PBE/6-311G(d,p)  | -0.338 | -0.016 | 0.036  | -0.032 | -0.032 | 0.37 | 0.163 | 0.133 | 0.98 |
| PBE/6-31G(d,p)   | -0.361 | -0.017 | 0.032  | -0.031 | -0.211 | 0.36 | 0.167 | 0.128 | 0.97 |
| BLYP/6-31G(d,p)  | -0.317 | 0.044  | -0.020 | -0.012 | 0.487  | 0.38 | 0.187 | 0.124 | 0.97 |
| Average          | -0.336 | -0.010 | 0.028  | -0.028 | 0.034  | 0.53 | 0.116 | 0.077 | 1.00 |

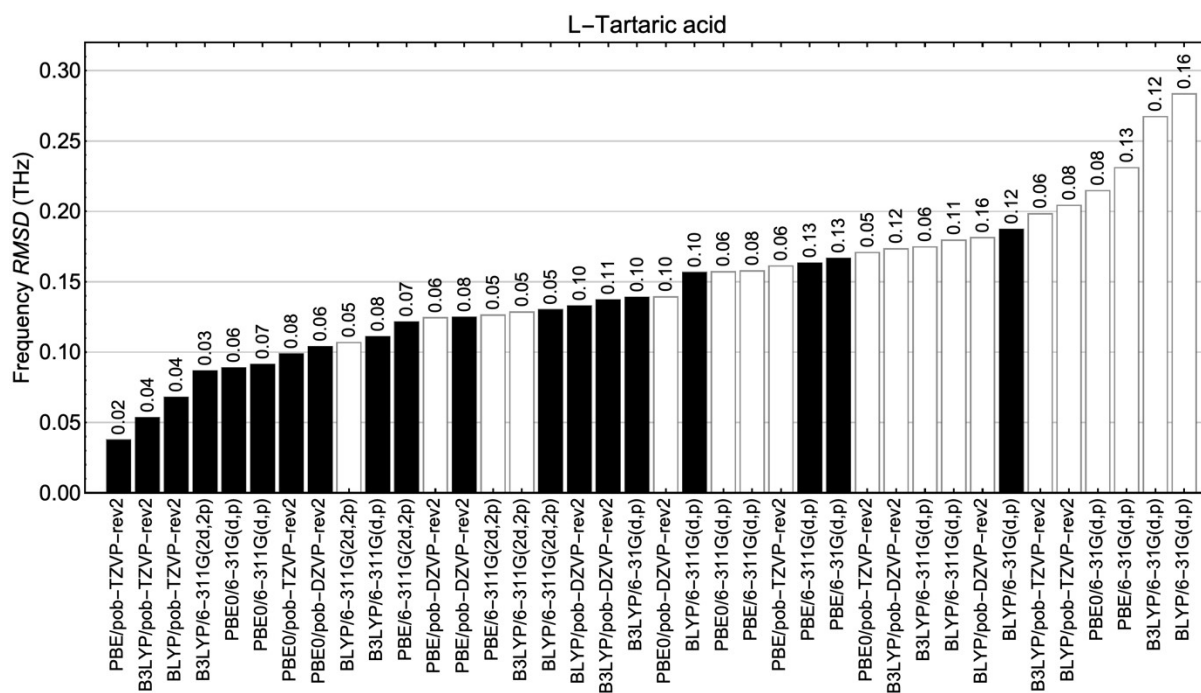

**Fig. S4** Bar chart showing the frequency RMSD for tartaric acid for all tested methods. Black bars are using the volume-constrained unit cell and white bars are using the fully-optimised unit cell. Standard deviations are given above each bar.

**Table S3** Summary of electronic energies computed for tartaric acid using standard GGA functionals.  $\Delta E$  is the difference in energy between the constrained cell and the unconstrained cell.

| Method             | Unconstrained Cell Energy<br>(a.u.) | Constrained Cell Energy<br>(a.u.) | $\Delta E$<br>(a.u.) |
|--------------------|-------------------------------------|-----------------------------------|----------------------|
| BLYP/6-311G(2d,2p) | -1215.183211                        | -1215.182053                      | 0.001158             |
| BLYP/6-311G(d,p)   | -1215.147903                        | -1215.146636                      | 0.001268             |
| BLYP/6-31G(d,p)    | -1214.768720                        | -1214.764226                      | 0.004494             |
| BLYP/pob-DZVP-rev2 | -1213.864547                        | -1213.862429                      | 0.002118             |
| BLYP/pob-TZVP-rev2 | -1215.133985                        | -1215.132780                      | 0.001205             |
| PBE/6-311G(2d,2p)  | -1214.092516                        | -1214.091647                      | 0.000870             |
| PBE/6-311G(d,p)    | -1214.056991                        | -1214.056027                      | 0.000964             |
| PBE/6-31G(d,p)     | -1213.709632                        | -1213.706175                      | 0.003457             |
| PBE/pob-DZVP-rev2  | -1212.798897                        | -1212.797275                      | 0.001622             |
| PBE/pob-TZVP-rev2  | -1214.051266                        | -1214.050377                      | 0.000889             |
| Average Per Atom   | -37.946274                          | -37.946218                        | 0.000056             |

**Table S4** Summary of electronic energies computed for tartaric acid using hybrid GGA functionals.

| Method              | Unconstrained Cell Energy<br>(a.u.) | Constrained Cell Energy<br>(a.u.) | $\Delta E$<br>(a.u.) |
|---------------------|-------------------------------------|-----------------------------------|----------------------|
| B3LYP/6-311G(2d,2p) | -1214.824736                        | -1214.822594                      | 0.002142             |
| B3LYP/6-311G(d,p)   | -1214.787937                        | -1214.785525                      | 0.002411             |
| B3LYP/6-31G(d,p)    | -1214.435165                        | -1214.429683                      | 0.005482             |
| B3LYP/pob-DZVP-rev2 | -1213.501789                        | -1213.498535                      | 0.003254             |
| B3LYP/pob-TZVP-rev2 | -1214.769841                        | -1214.767569                      | 0.002273             |
| PBE0/6-311G(d,p)    | -1214.037419                        | -1214.035401                      | 0.002017             |
| PBE0/6-31G(d,p)     | -1213.713849                        | -1213.709188                      | 0.004661             |
| PBE0/pob-DZVP-rev2  | -1212.764849                        | -1212.761859                      | 0.002990             |
| PBE0/pob-TZVP-rev2  | -1214.025341                        | -1214.023312                      | 0.002029             |
| Average per atom    | -37.940489                          | -37.940395                        | 0.000095             |

**Table S5** Summary of errors (as compared to experiment) for unconstrained simulations of  $\alpha$ -lactose monohydrate.

| Theoretical Method | Volume ( $\text{\AA}^3$ ) | A ( $\text{\AA}$ ) | B ( $\text{\AA}$ ) | C ( $\text{\AA}$ ) | Beta ( $^\circ$ ) | Cell RMSD (%) | Frequency RMSD (THz) | Frequency SD | Scaling Factor |
|--------------------|---------------------------|--------------------|--------------------|--------------------|-------------------|---------------|----------------------|--------------|----------------|
| BLYP/6-311G(2d,2p) | -29.817                   | 0.035              | -0.068             | -0.167             | 0.808             | 2.35          | 0.090                | 0.062        | 0.95           |
| PBE/6-311G(2d,2p)  | -31.263                   | -0.060             | -0.171             | -0.128             | -0.218            | 2.22          | 0.106                | 0.033        | 0.93           |
| BLYP/6-311G(d,p)   | -23.073                   | 0.007              | -0.132             | -0.143             | -0.833            | 1.93          | 0.122                | 0.018        | 0.91           |
| BLYP/pob-DZVP-rev2 | -28.324                   | 0.043              | -0.079             | -0.158             | 0.862             | 2.24          | 0.122                | 0.061        | 0.94           |
| PBE/6-311G(d,p)    | -33.641                   | -0.059             | -0.159             | -0.144             | -0.143            | 2.40          | 0.149                | 0.098        | 0.92           |
| PBE/pob-DZVP-rev2  | -26.287                   | -0.057             | -0.178             | -0.121             | -1.066            | 2.00          | 0.162                | 0.018        | 0.89           |
| BLYP/pob-TZVP-rev2 | -51.235                   | -0.086             | -0.248             | -0.207             | 0.307             | 3.60          | 0.190                | 0.036        | 0.87           |
| PBE/6-31G(d,p)     | -33.838                   | -0.015             | -0.135             | -0.175             | -0.107            | 2.56          | 0.203                | 0.051        | 0.87           |
| BLYP/6-31G(d,p)    | -50.623                   | 0.008              | -0.139             | -0.244             | 1.541             | 3.76          | 0.235                | 0.033        | 0.85           |
| PBE/pob-TZVP-rev2  | -39.232                   | -0.098             | -0.211             | -0.161             | -0.713            | 2.82          | 0.281                | 0.060        | 0.83           |
| Average            | -34.733                   | -0.028             | -0.152             | -0.165             | 0.044             | 2.59          | 0.166                | 0.047        | 0.90           |

**Table S6** Summary of errors (as compared to experiment) for constrained simulations of  $\alpha$ -lactose monohydrate.

| Theoretical Method | Volume ( $\text{\AA}^3$ ) | A ( $\text{\AA}$ ) | B ( $\text{\AA}$ ) | C ( $\text{\AA}$ ) | Beta ( $^\circ$ ) | Cell RMSD (%) | Frequency RMSD (THz) | Frequency SD | Scaling Factor |
|--------------------|---------------------------|--------------------|--------------------|--------------------|-------------------|---------------|----------------------|--------------|----------------|
| BLYP/6-311G(2d,2p) | -0.264                    | 0.058              | 0.126              | -0.060             | 0.151             | 0.70          | 0.063                | 0.024        | 0.96           |
| PBE/6-311G(2d,2p)  | -0.408                    | -0.015             | 0.074              | -0.019             | -0.306            | 0.28          | 0.070                | 0.018        | 0.95           |
| BLYP/6-311G(d,p)   | -0.266                    | 0.058              | 0.143              | -0.060             | 0.259             | 0.72          | 0.095                | 0.017        | 0.93           |
| PBE/pob-DZVP-rev2  | -0.209                    | 0.044              | 0.075              | -0.067             | -0.751            | 0.75          | 0.099                | 0.045        | 0.94           |
| BLYP/pob-DZVP-rev2 | -0.337                    | -0.012             | 0.052              | -0.034             | -0.922            | 0.50          | 0.113                | 0.033        | 0.93           |
| BLYP/pob-TZVP-rev2 | -0.196                    | -0.011             | 0.097              | -0.022             | -0.180            | 0.30          | 0.117                | 0.036        | 0.91           |
| PBE/6-311G(d,p)    | -0.220                    | 0.031              | 0.169              | -0.069             | -0.383            | 0.76          | 0.140                | 0.072        | 0.92           |
| PBE/pob-TZVP-rev2  | -0.241                    | 0.044              | 0.152              | -0.047             | 0.466             | 0.62          | 0.142                | 0.077        | 0.90           |
| BLYP/6-31G(d,p)    | -0.313                    | -0.024             | 0.096              | -0.009             | 0.008             | 0.25          | 0.174                | 0.091        | 0.88           |
| PBE/6-31G(d,p)     | -0.232                    | -0.034             | 0.133              | -0.033             | -0.758            | 0.55          | 0.176                | 0.050        | 0.89           |
| Average            | -0.269                    | 0.014              | 0.112              | -0.042             | -0.242            | 0.54          | 0.119                | 0.046        | 0.92           |

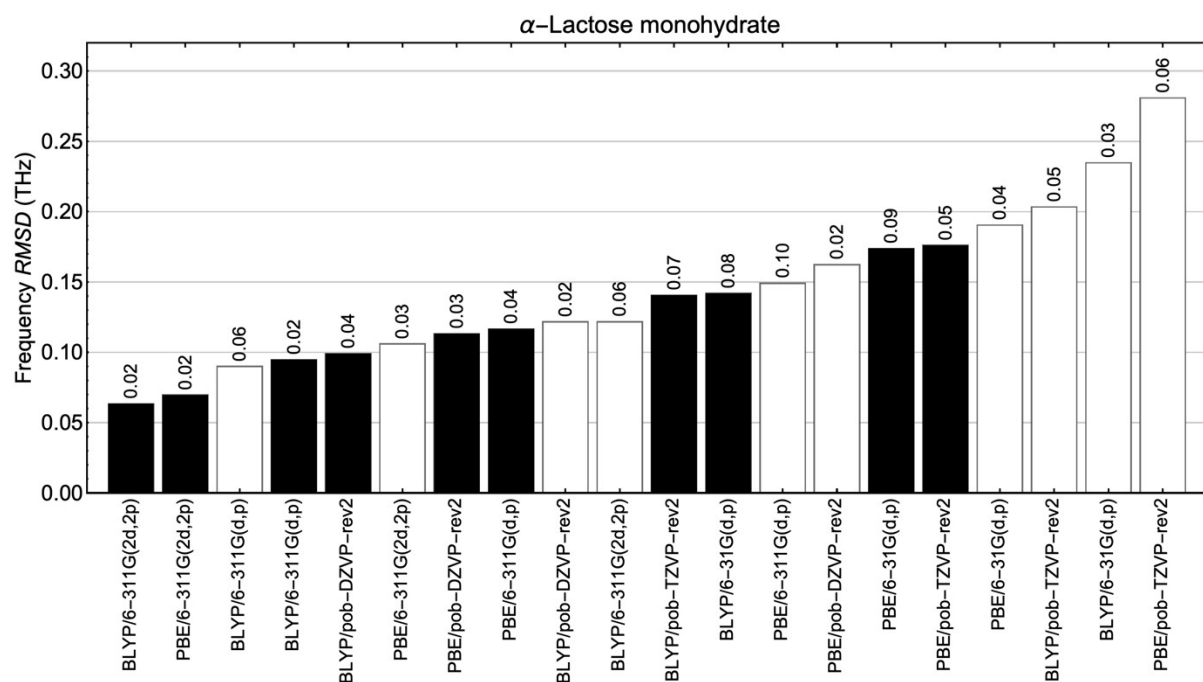

**Fig. S5** Bar chart showing the frequency RMSD for lactose for all tested methods. Black bars are using the volume-constrained unit cell and white bars are using the fully-optimised unit cell. Standard deviations are given above each bar.

**Table S7** Summary of electronic energies computed for lactose.

| Method             | Unconstrained Cell Energy (a.u.) | Constrained Cell Energy (a.u.) | $\Delta E$ (a.u.) |
|--------------------|----------------------------------|--------------------------------|-------------------|
| BLYP/6-311G(2d,2p) | -2749.387446                     | -2749.385492                   | 0.001954          |
| BLYP/6-311G(d,p)   | -2749.299525                     | -2749.297252                   | 0.002273          |
| BLYP/6-31G(d,p)    | -2748.472026                     | -2748.463575                   | 0.008450          |
| BLYP/pob-DZVP-rev2 | -2746.476750                     | -2746.475425                   | 0.001325          |
| BLYP/pob-TZVP-rev2 | -2749.259549                     | -2749.256513                   | 0.003036          |
| PBE/6-311G(2d,2p)  | -2746.965367                     | -2746.962967                   | 0.002400          |
| PBE/6-311G(d,p)    | -2746.880095                     | -2746.877145                   | 0.002950          |
| PBE/6-31G(d,p)     | -2746.122400                     | -2746.113983                   | 0.008418          |
| PBE/pob-DZVP-rev2  | -2744.114060                     | -2744.112264                   | 0.001796          |
| PBE/pob-TZVP-rev2  | -2746.855980                     | -2746.851714                   | 0.004266          |
| Average per atom   | -28.618576                       | -28.618538                     | 0.000038          |



**Table S8** Summary of errors (as compared to experiment) for unconstrained simulations of  $\alpha$ -para-aminobenzoic acid.

| Theoretical Method | Volume ( $\text{\AA}^3$ ) | A ( $\text{\AA}$ ) | B ( $\text{\AA}$ ) | C ( $\text{\AA}$ ) | Beta ( $^\circ$ ) | Cell RMSD (%) | Frequency RMSD (THz) | Frequency SD | Scaling Factor |
|--------------------|---------------------------|--------------------|--------------------|--------------------|-------------------|---------------|----------------------|--------------|----------------|
| PBE/6-311G(2d,2p)  | -76.468                   | 0.151              | -0.138             | -0.506             | 2.219             | 3.46          | 0.173                | 0.090        | 0.92           |
| PBE/6-311G(d,p)    | -87.588                   | 0.174              | -0.179             | -0.498             | 1.906             | 3.94          | 0.192                | 0.088        | 0.91           |
| BLYP/pob-DZVP-rev2 | -107.284                  | 0.022              | -0.181             | -0.623             | 2.165             | 4.56          | 0.236                | 0.101        | 0.88           |
| PBE/pob-DZVP-rev2  | -110.966                  | 0.128              | -0.237             | -0.494             | 2.502             | 4.95          | 0.239                | 0.136        | 0.88           |
| PBE/6-31G(d,p)     | -157.002                  | -0.021             | -0.297             | -0.772             | 1.404             | 6.62          | 0.242                | 0.081        | 0.88           |
| BLYP/6-311G(d,p)   | -117.121                  | 0.147              | -0.261             | -0.490             | 2.212             | 5.24          | 0.246                | 0.151        | 0.88           |
| BLYP/6-311G(2d,2p) | -115.185                  | 0.057              | -0.226             | -0.550             | 2.245             | 4.99          | 0.257                | 0.106        | 0.87           |
| BLYP/6-31G(d,p)    | -135.408                  | 0.052              | -0.274             | -0.576             | 3.174             | 5.93          | 0.286                | 0.121        | 0.87           |
| BLYP/pob-TZVP-rev2 | -142.046                  | -0.015             | -0.281             | -0.620             | 1.893             | 6.05          | 0.299                | 0.115        | 0.85           |
| PBE/pob-TZVP-rev2  | -190.129                  | -0.053             | -0.382             | -0.821             | 1.421             | 8.08          | 0.310                | 0.127        | 0.86           |
| Average            | -123.920                  | 0.064              | -0.246             | -0.595             | 2.114             | 5.38          | 0.248                | 0.112        | 0.88           |

**Table S9** Summary of errors (as compared to experiment) for constrained simulations of  $\alpha$ -para-aminobenzoic acid.

| Theoretical Method | Volume ( $\text{\AA}^3$ ) | A ( $\text{\AA}$ ) | B ( $\text{\AA}$ ) | C ( $\text{\AA}$ ) | Beta ( $^\circ$ ) | Cell RMSD (%) | Frequency RMSD (THz) | Frequency SD | Scaling Factor |
|--------------------|---------------------------|--------------------|--------------------|--------------------|-------------------|---------------|----------------------|--------------|----------------|
| BLYP/pob-DZVP-rev2 | -0.186                    | 0.402              | -0.014             | -0.291             | 1.551             | 1.41          | 0.051                | 0.048        | 1.01           |
| PBE/pob-TZVP-rev2  | -0.634                    | 0.787              | -0.202             | 0.198              | -1.894            | 3.19          | 0.073                | 0.039        | 1.04           |
| PBE/6-311G(d,p)    | -0.130                    | 0.458              | -0.024             | -0.297             | 1.484             | 1.52          | 0.086                | 0.079        | 1.03           |
| PBE/pob-DZVP-rev2  | -0.156                    | 0.536              | -0.054             | -0.206             | 2.279             | 1.87          | 0.098                | 0.078        | 1.04           |
| BLYP/pob-TZVP-rev2 | -0.267                    | 0.525              | -0.068             | -0.202             | -0.608            | 1.59          | 0.098                | 0.073        | 1.03           |
| BLYP/6-311G(d,p)   | -0.239                    | 0.620              | -0.082             | -0.159             | 1.951             | 2.04          | 0.106                | 0.087        | 1.04           |
| PBE/6-31G(d,p)     | -0.127                    | 0.399              | 0.001              | -0.350             | 1.889             | 1.56          | 0.118                | 0.111        | 1.00           |
| PBE/6-311G(2d,2p)  | -0.232                    | 0.580              | -0.065             | -0.198             | 2.160             | 1.95          | 0.122                | 0.116        | 1.03           |
| BLYP/6-31G(d,p)    | -0.243                    | 0.568              | -0.050             | -0.248             | 2.443             | 1.98          | 0.125                | 0.117        | 0.99           |
| BLYP/6-311G(2d,2p) | -0.208                    | 0.359              | 0.023              | -0.409             | 2.179             | 1.69          | 0.129                | 0.100        | 0.96           |
| Average            | -0.242                    | 0.523              | -0.054             | -0.216             | 1.343             | 1.88          | 0.101                | 0.085        | 1.02           |

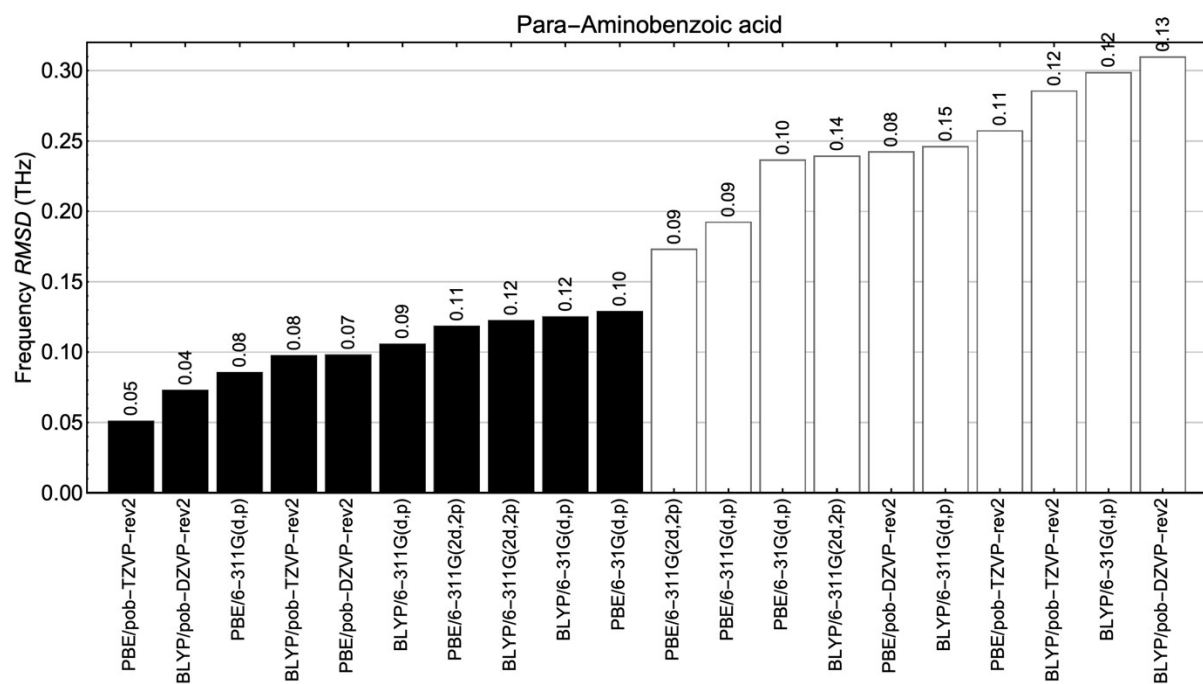

**Fig. S6** Bar chart showing the frequency RMSD for PABA for all tested methods. Black bars are using the volume-constrained unit cell and white bars are using the fully-optimised unit cell. Standard deviations are given above each bar.

**Table S10** Summary of electronic energies computed for PABA.

| Method             | Unconstrained Cell Energy (a.u.) | Constrained Cell Energy (a.u.) | $\Delta E$ (a.u.) |
|--------------------|----------------------------------|--------------------------------|-------------------|
| BLYP/6-311G(2d,2p) | -3810.300363                     | -3810.288689                   | 0.011674          |
| BLYP/6-311G(d,p)   | -3810.177050                     | -3810.163470                   | 0.013580          |
| BLYP/6-31G(d,p)    | -3809.116965                     | -3809.094133                   | 0.022832          |
| BLYP/pob-DZVP-rev2 | -3806.156467                     | -3806.105024                   | 0.051443          |
| BLYP/pob-TZVP-rev2 | -3810.075177                     | -3810.055405                   | 0.019772          |
| PBE/6-311G(2d,2p)  | -3806.794769                     | -3806.790654                   | 0.004115          |
| PBE/6-311G(d,p)    | -3806.677672                     | -3806.671541                   | 0.006131          |
| PBE/6-31G(d,p)     | -3805.724152                     | -3805.713973                   | 0.010179          |
| PBE/pob-DZVP-rev2  | -3802.772577                     | -3802.742800                   | 0.029778          |
| PBE/pob-TZVP-rev2  | -3806.588583                     | -3806.576971                   | 0.011613          |
| Average per atom   | -27.995870                       | -27.995737                     | 0.000133          |

## Appendix S4 Average Simulated Spectrum – Scaled

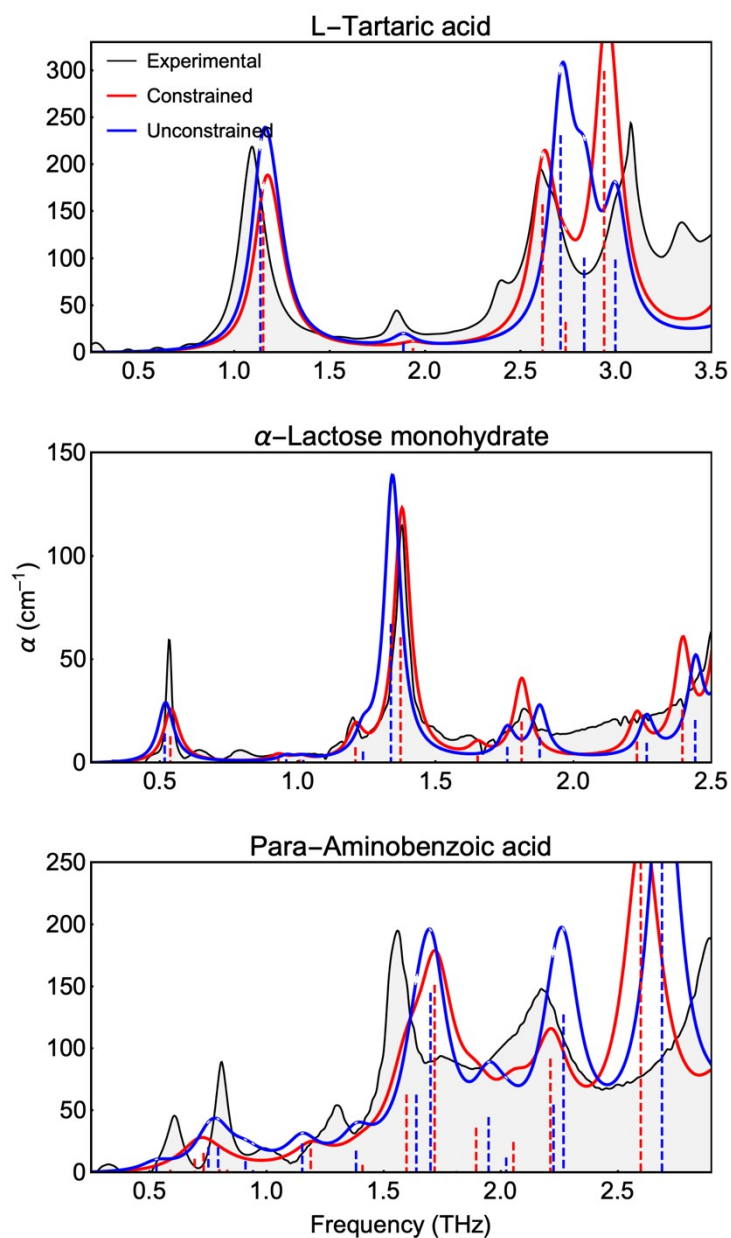

**Fig. S7** Room-temperature THz-TDS absorption spectrum (grey) compared with the average simulated spectrum produced using a volume constrained cell (red) and a fully optimised cell (blue). These were plotted according to equation 1 assuming a FWHM of 5, 2.5, and 6  $\text{cm}^{-1}$ , for tartaric acid, lactose, and PABA, respectively, and frequency scaled to minimise the RMSD.

## Appendix S5 Complete List of Raw Simulated Spectra

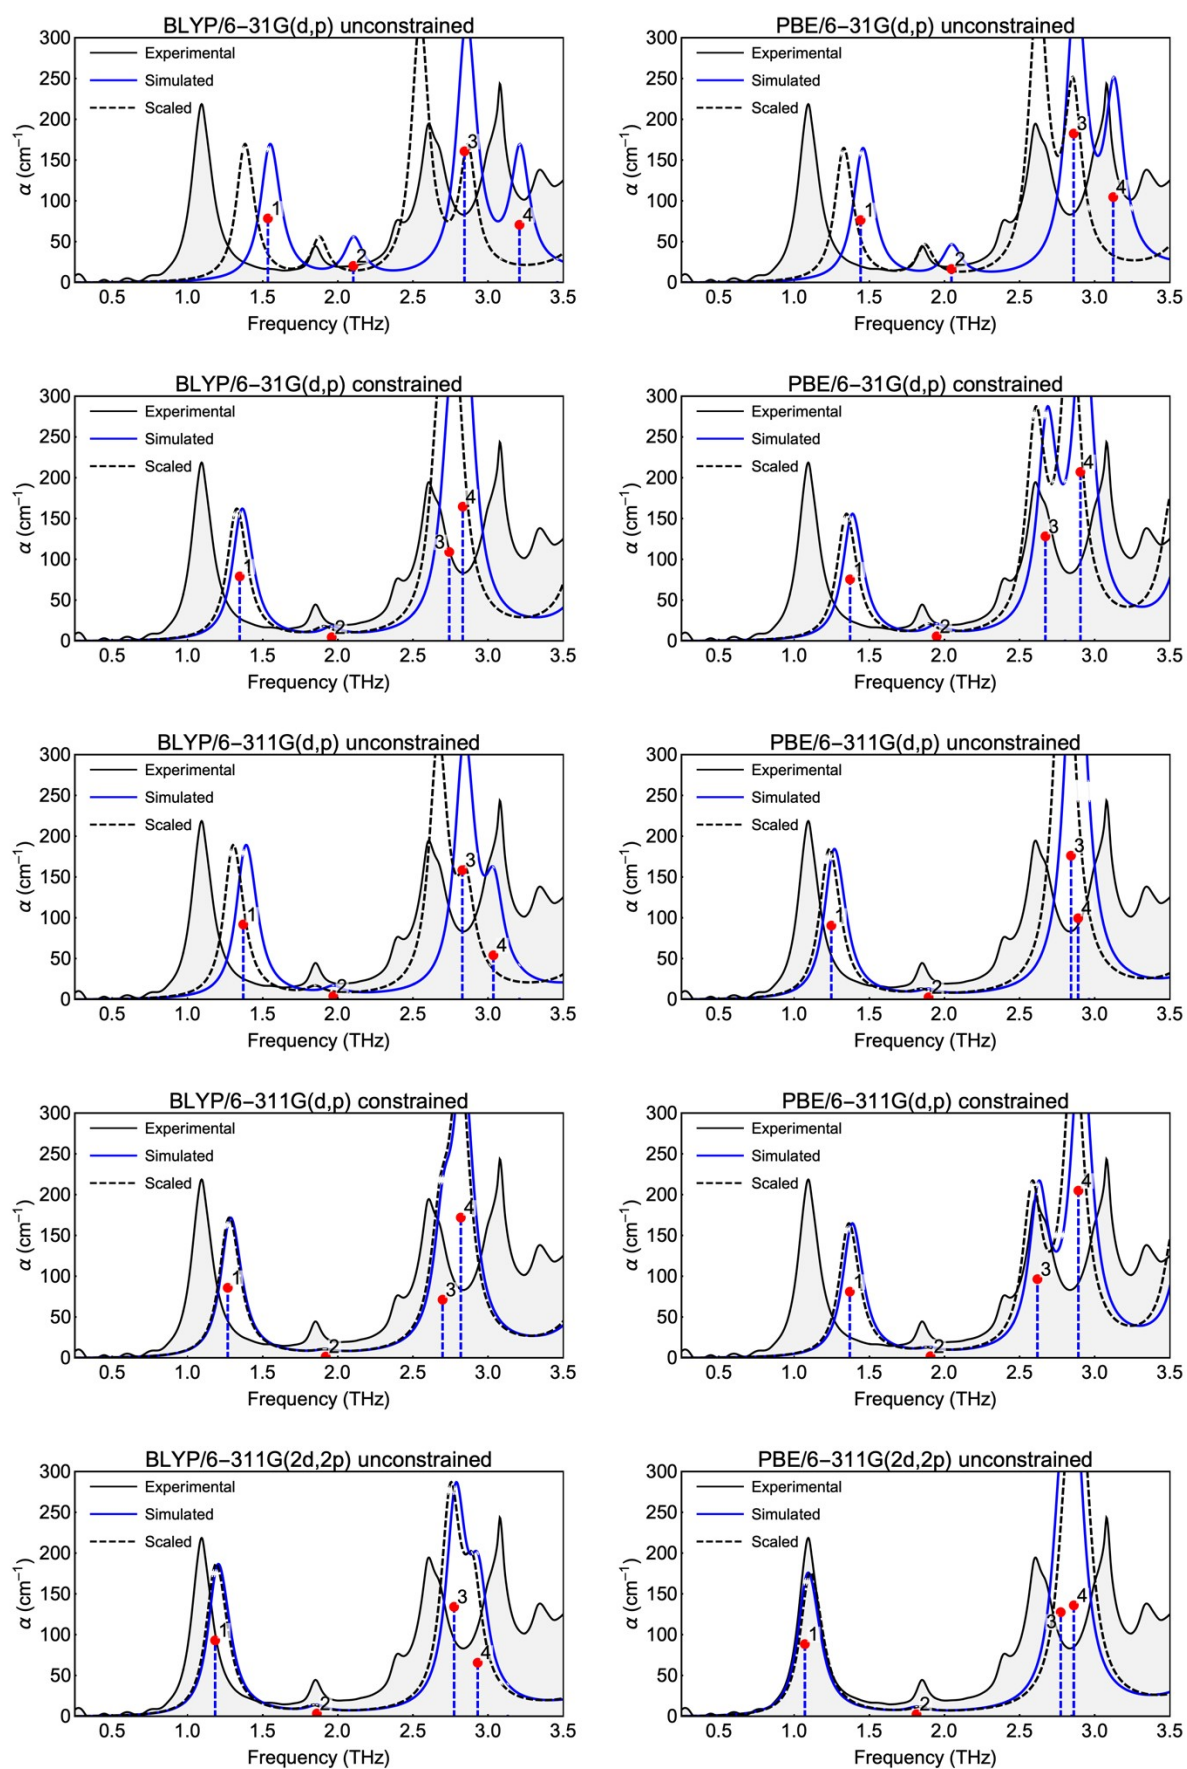

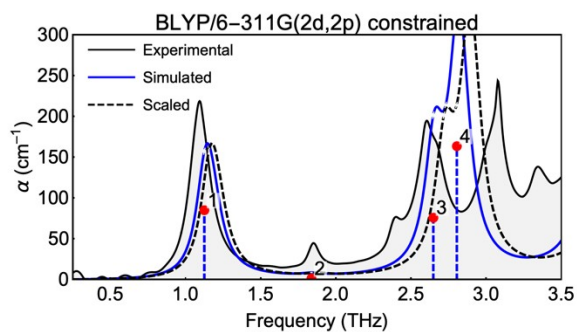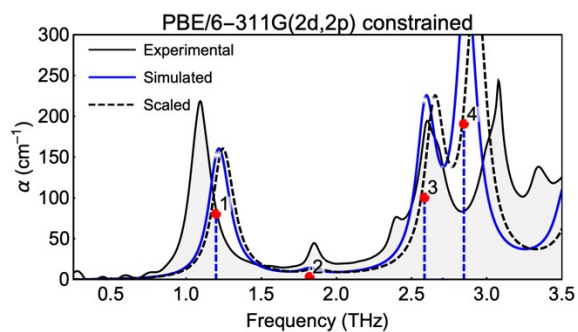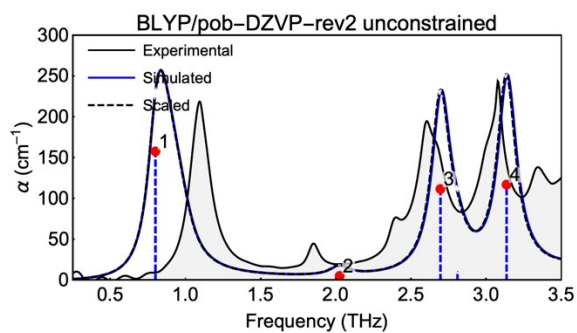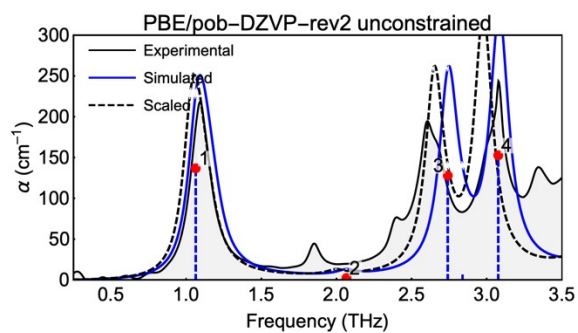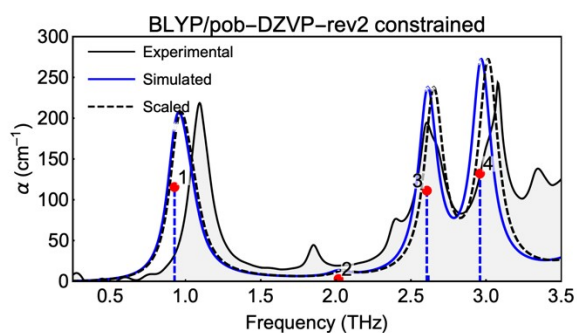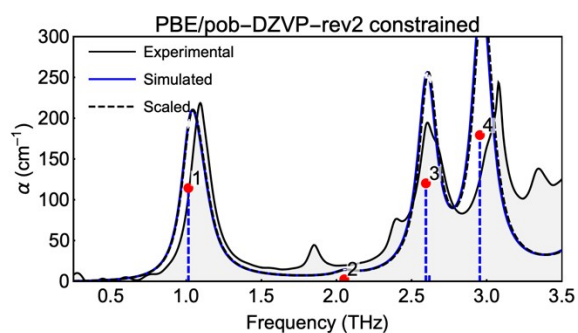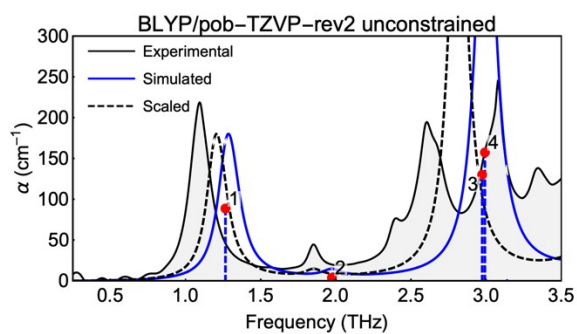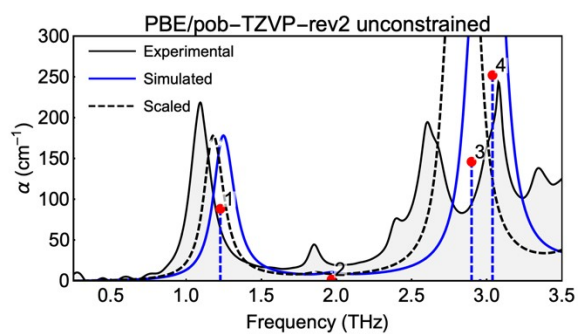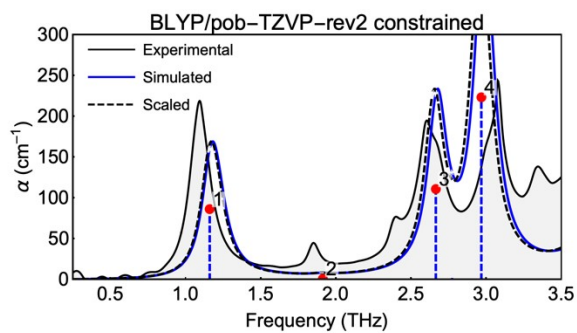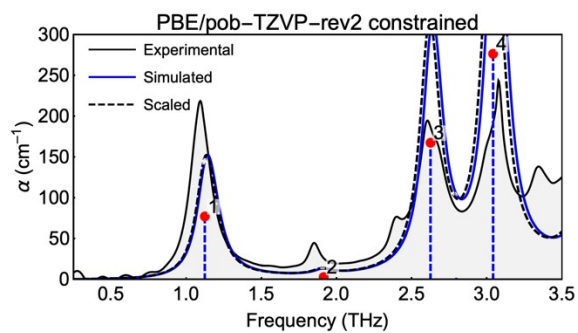

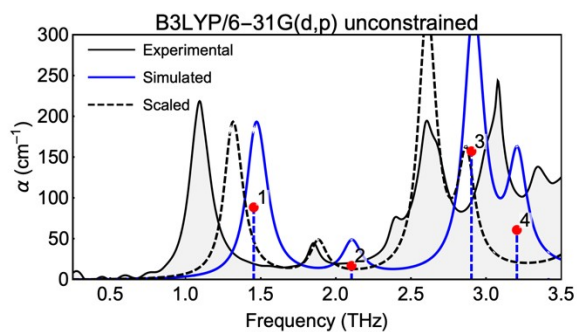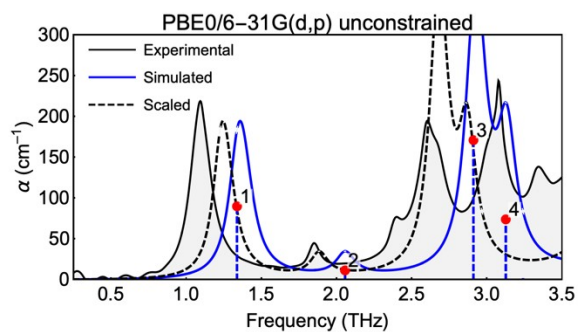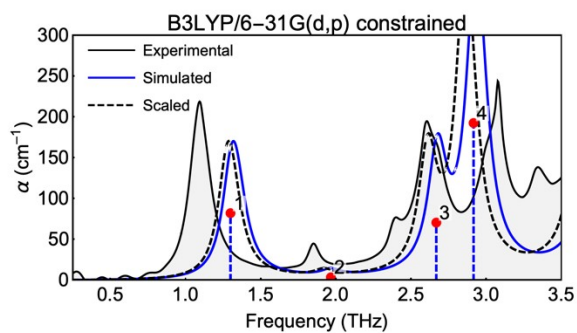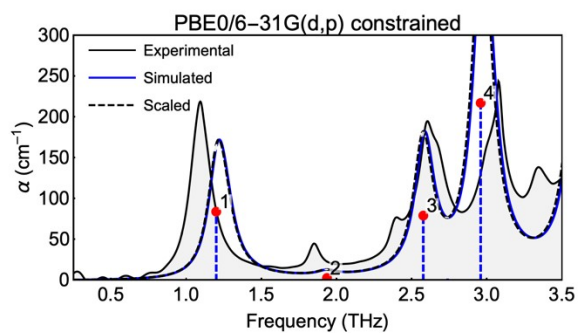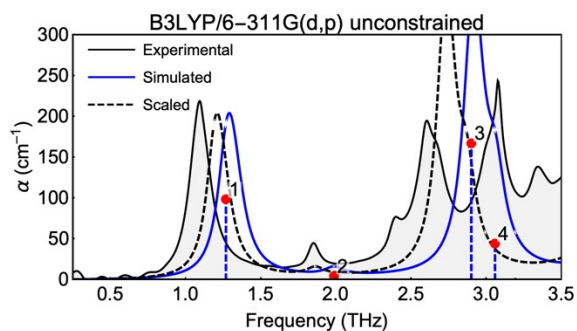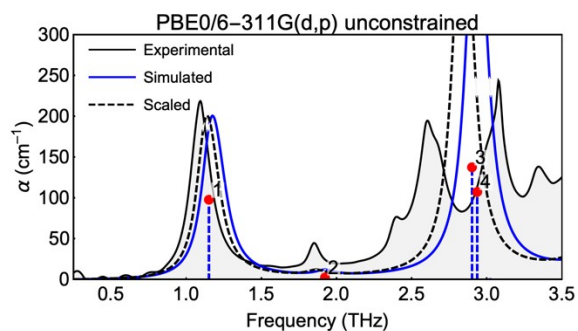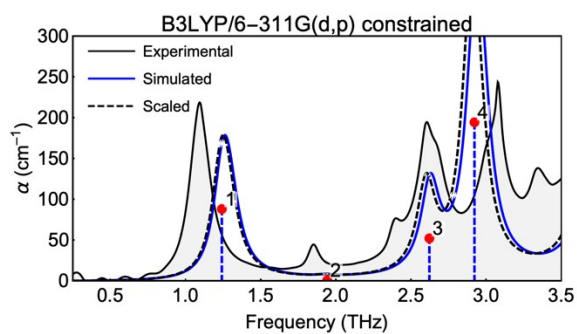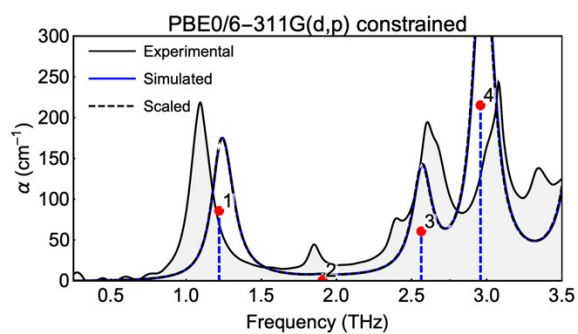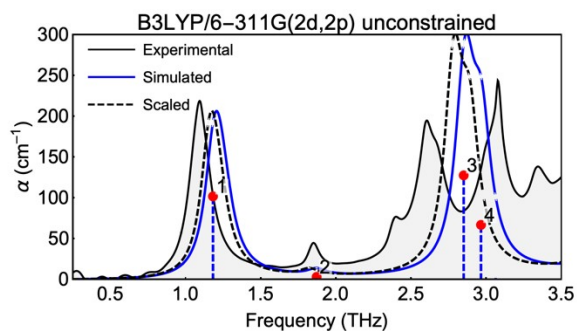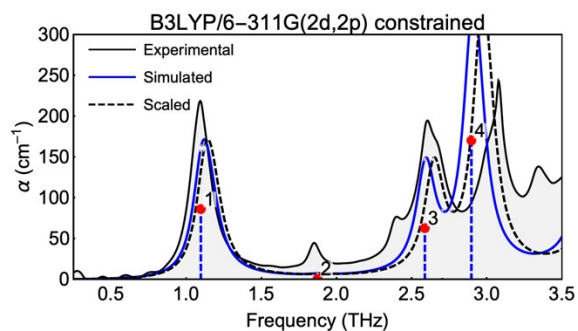

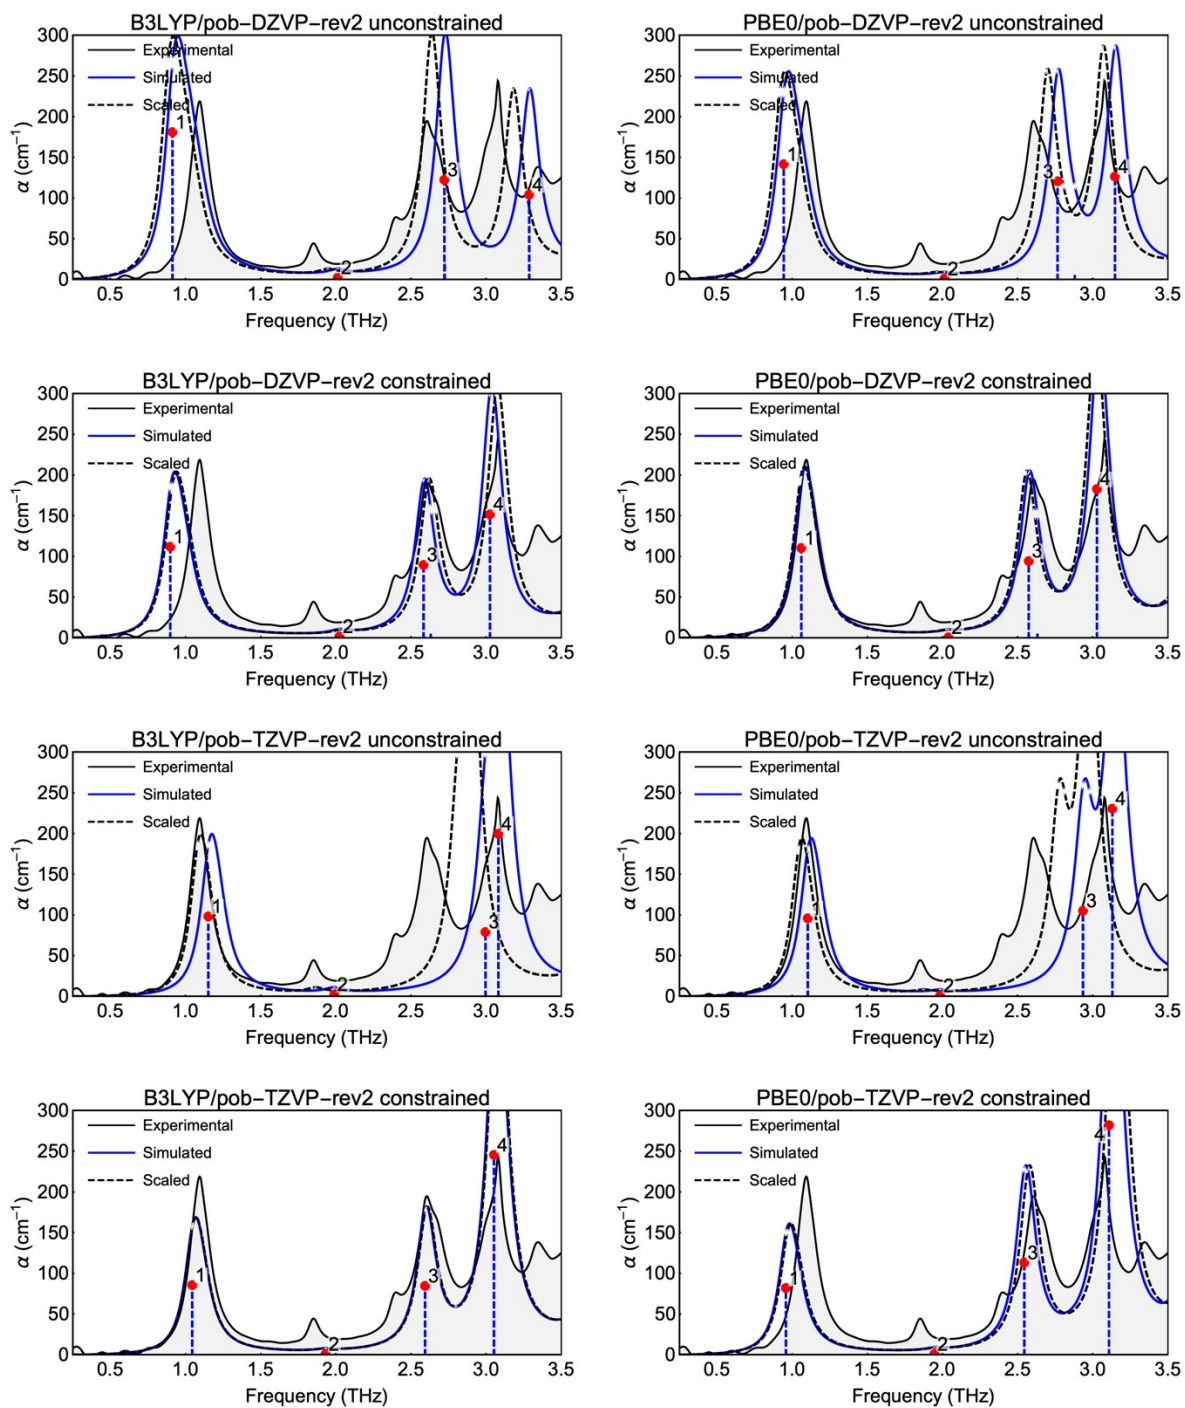

**Fig. S8** Simulated spectra of L-tartaric acid plotted assuming a FWHM of  $5 \text{ cm}^{-1}$ . Selected modes are numbered and marked by the red dots.

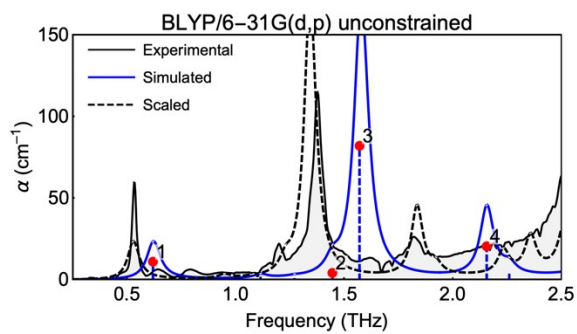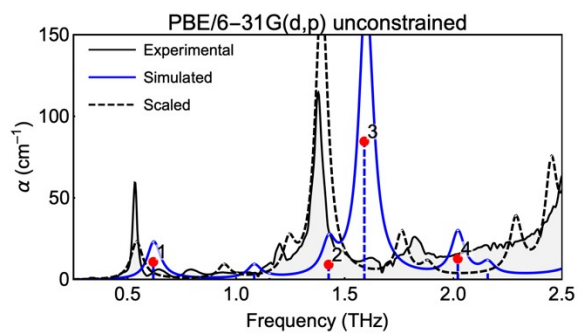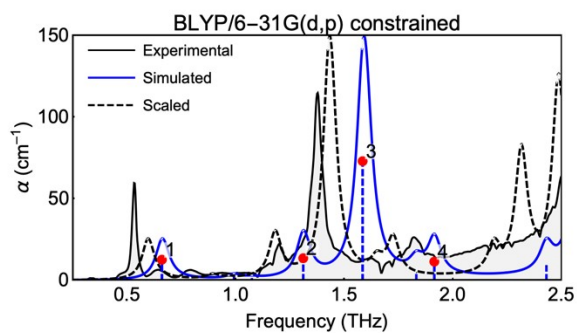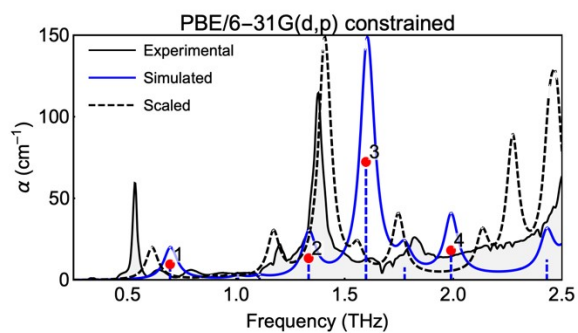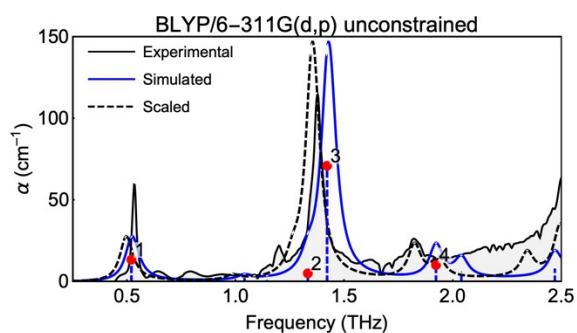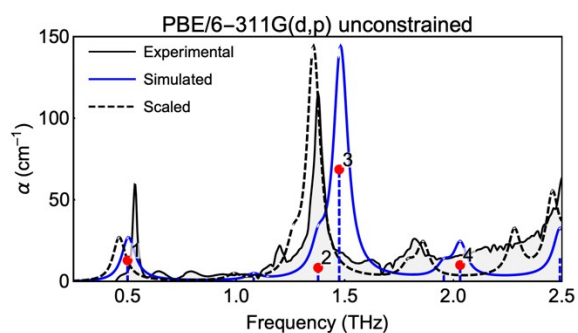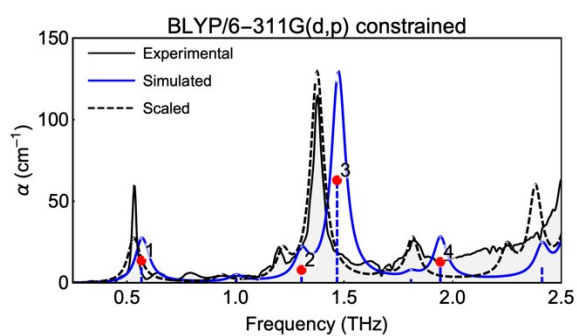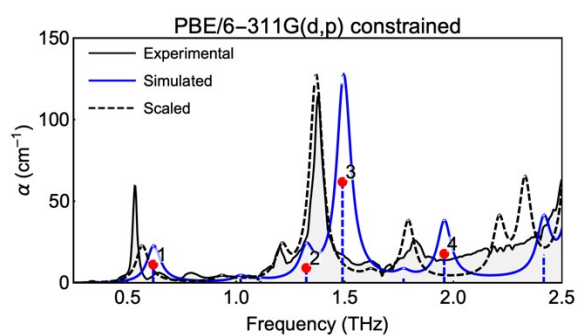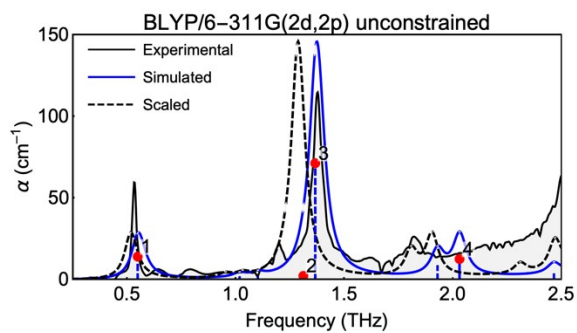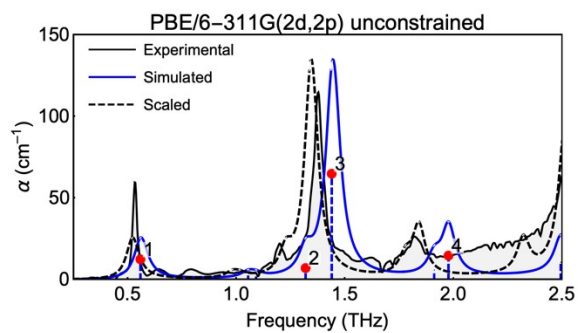



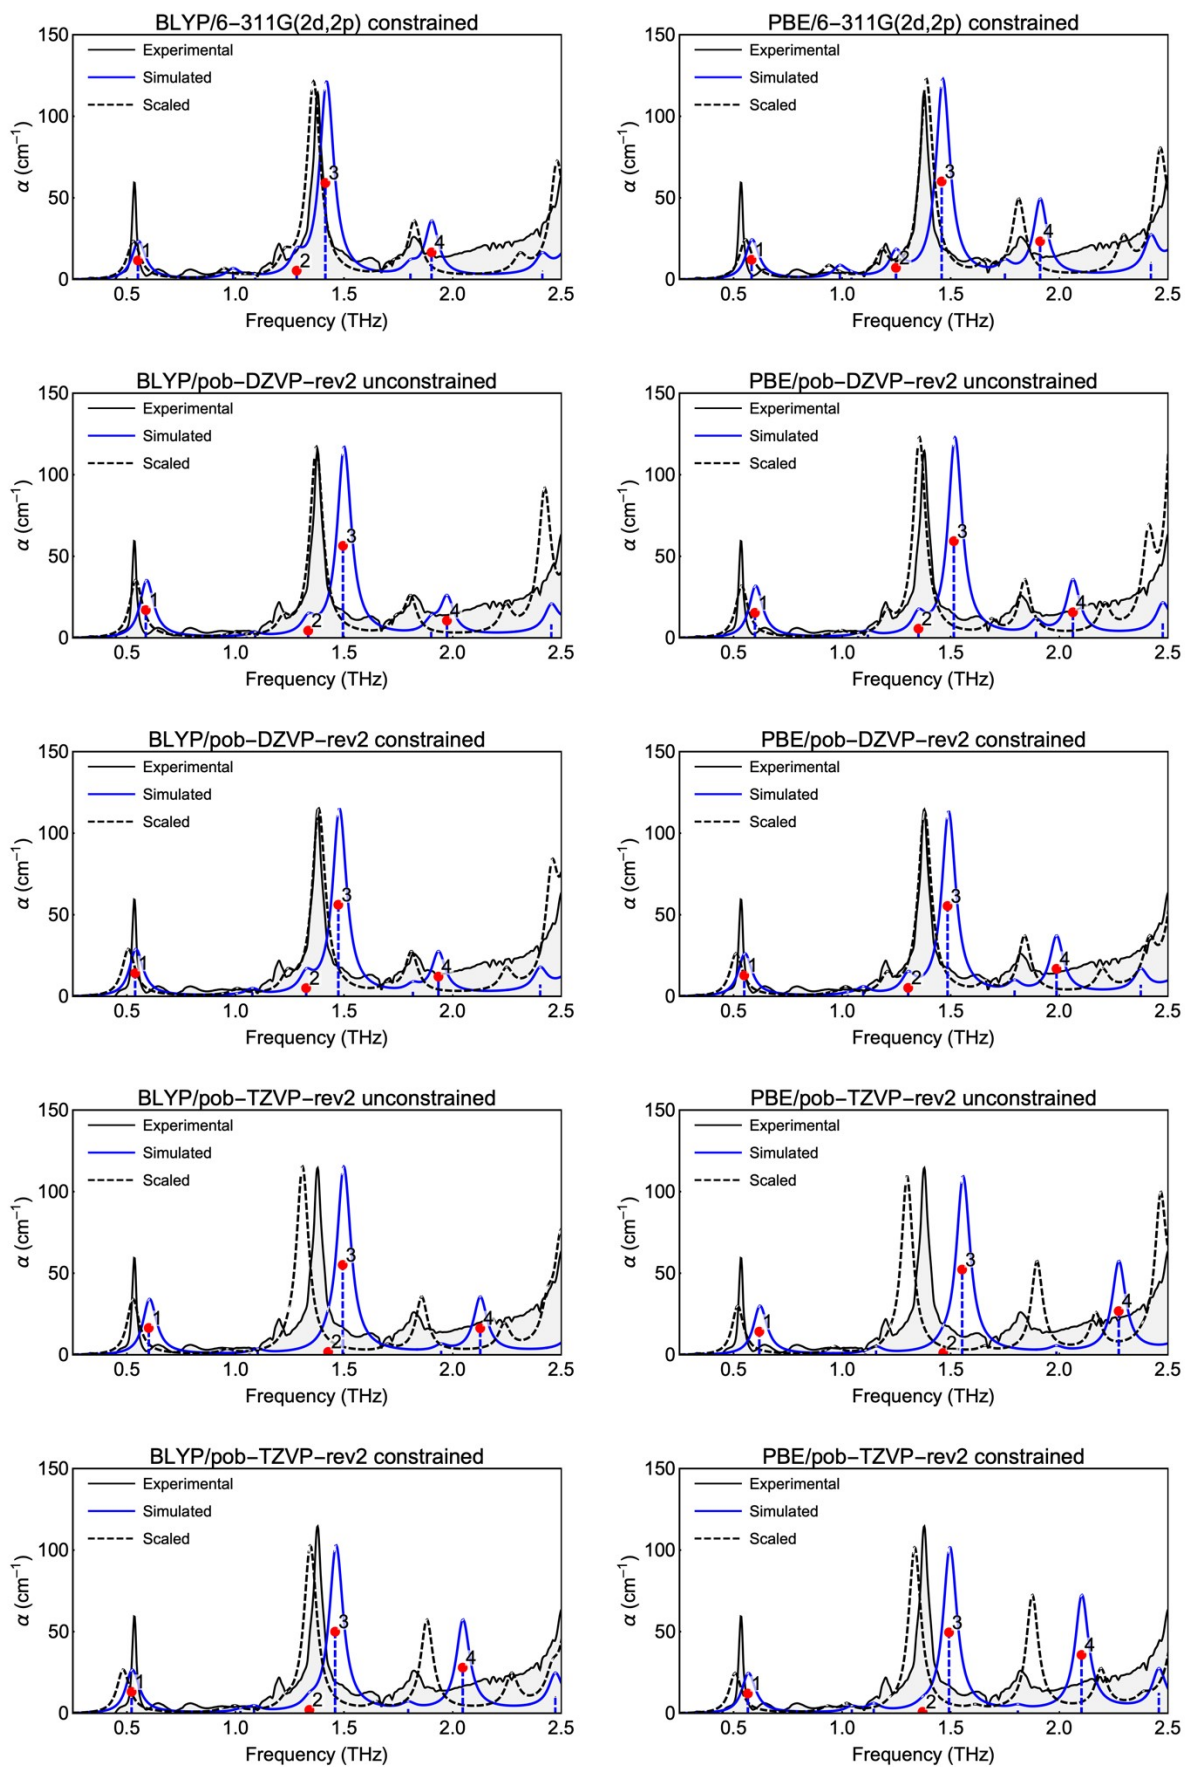

Fig. S9 Simulated spectra of  $\alpha$ -Lactose monohydrate plotted assuming a FWHM of  $2.5 \text{ cm}^{-1}$ .

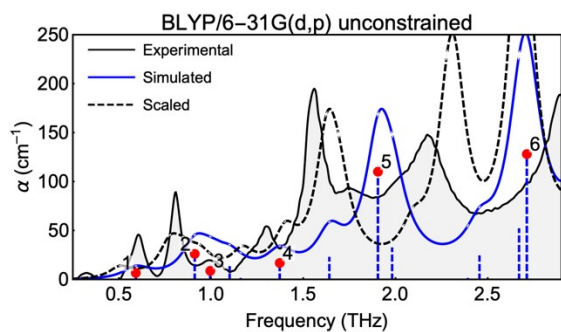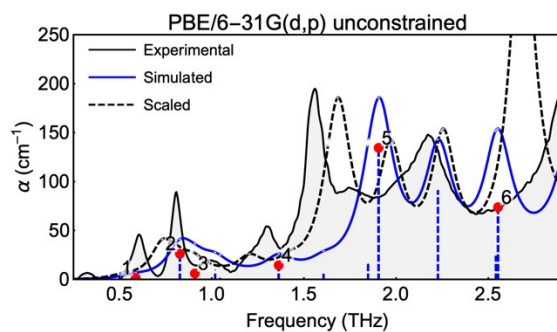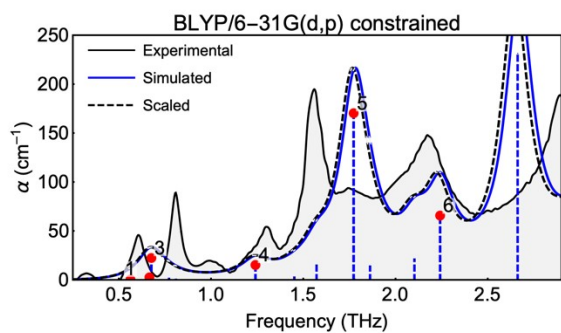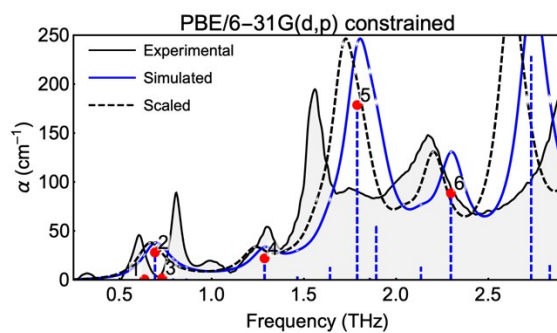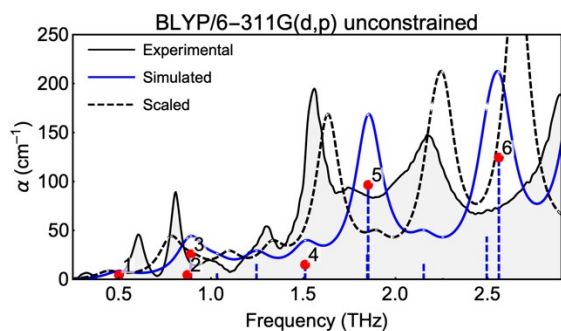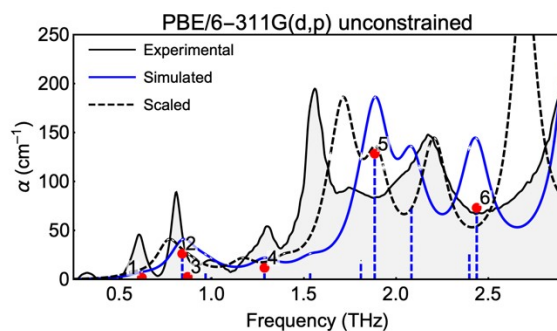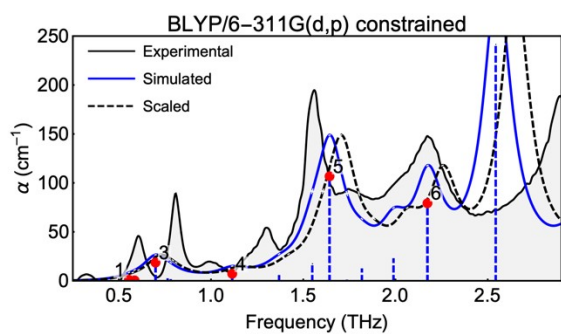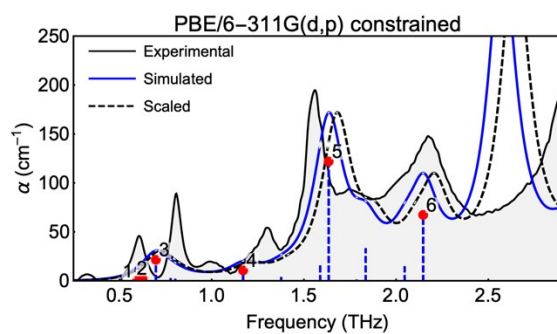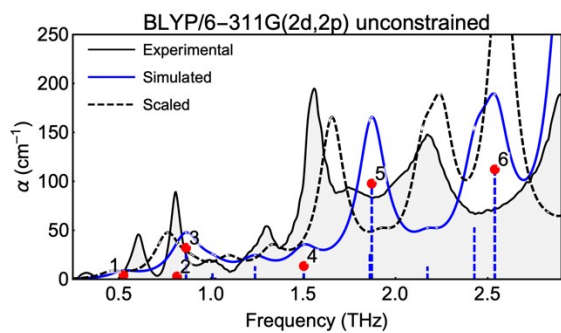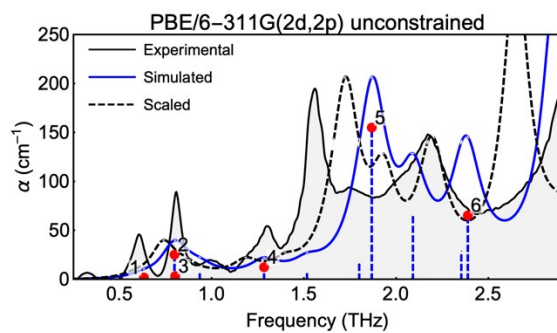

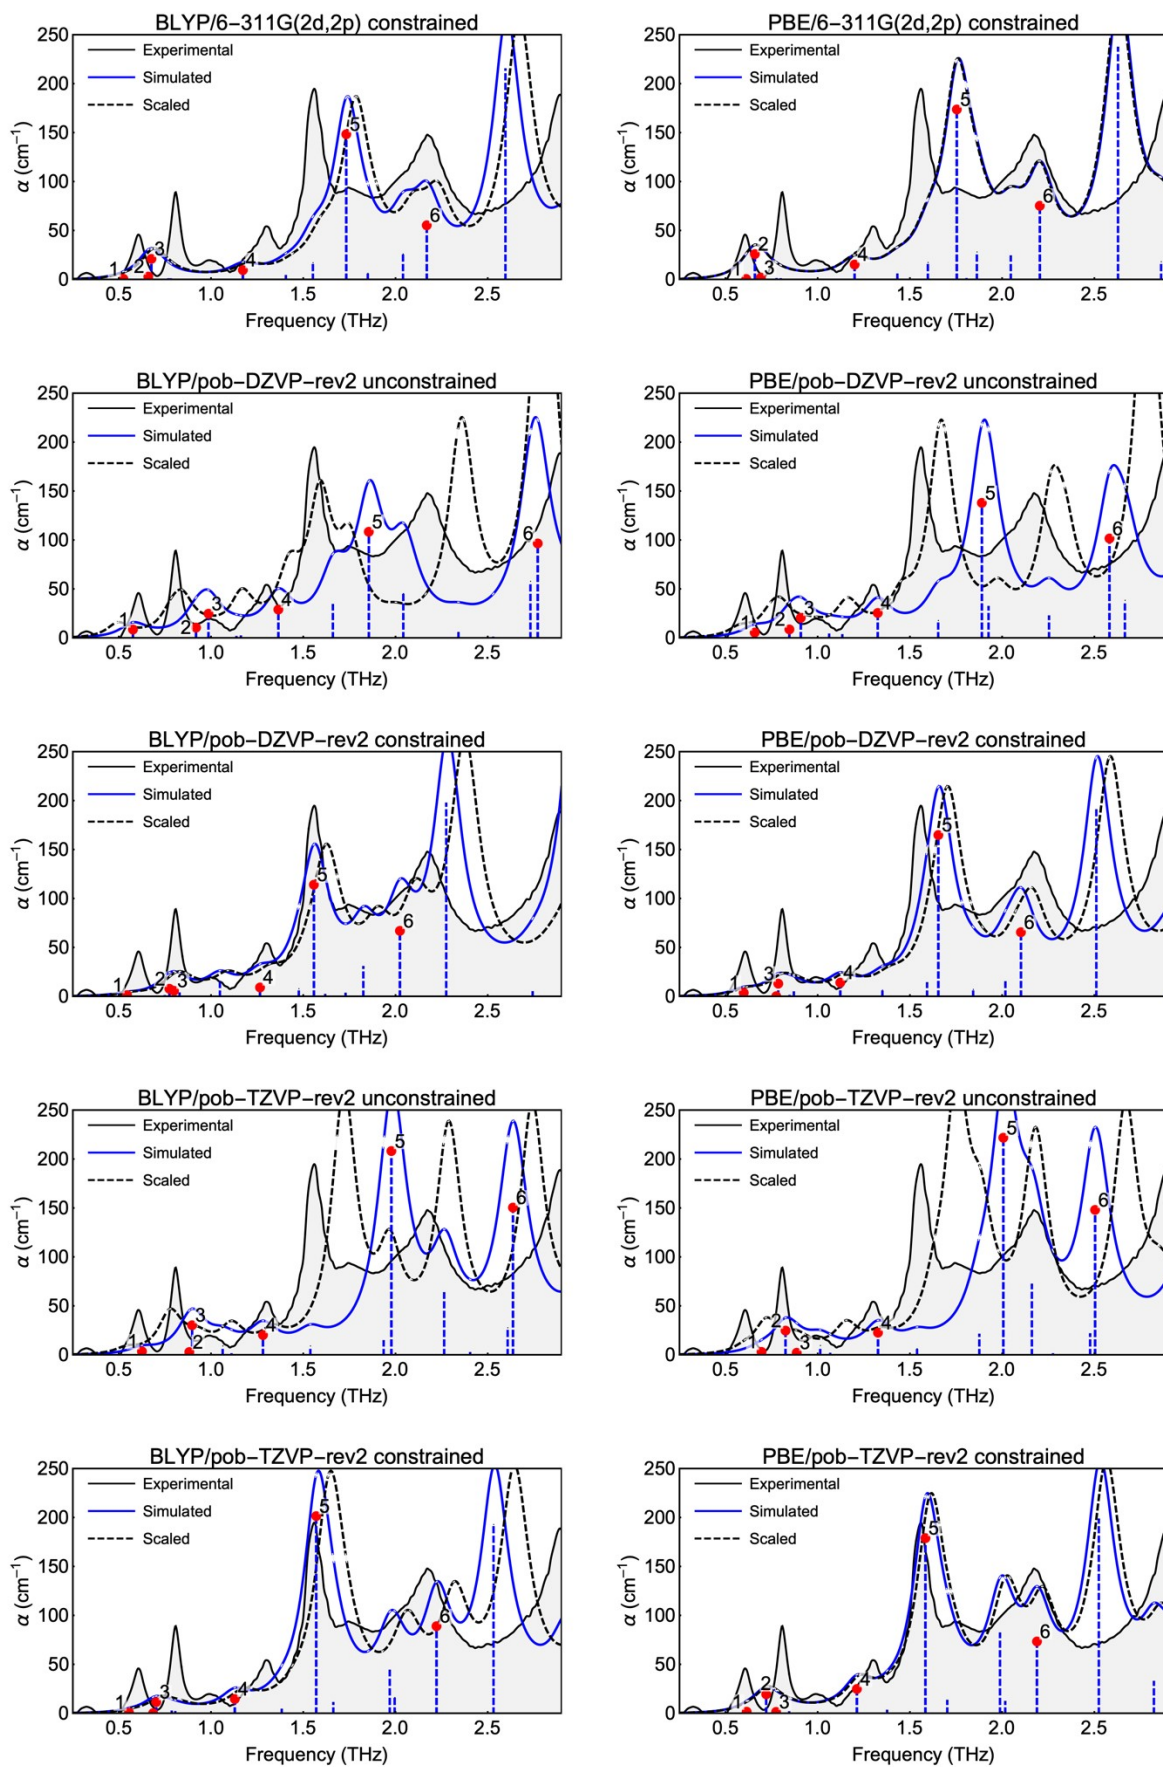

Fig. S10 Simulated spectra of  $\alpha$ -para-aminobenzoic acid plotted assuming a FWHM of  $6\text{ cm}^{-1}$ .

## Appendix S6 THz Vibrational Modes of Para-Aminobenzoic acid (PABA)

Computed using the PBE/6-311G(2d,2p) method using the volume constrained cell, unless otherwise indicated, and visualised in PyMOL using the PyVibMS plugin.<sup>5</sup>

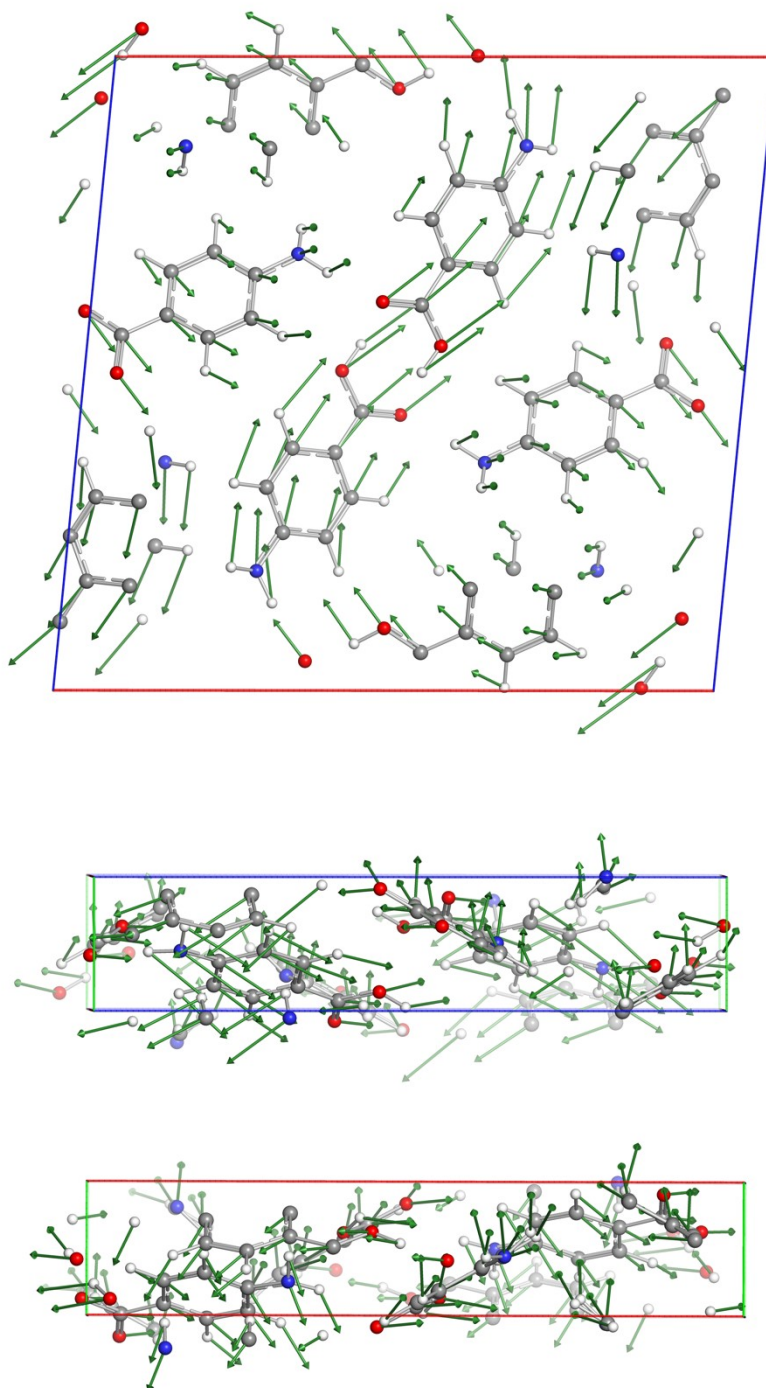

**Fig. S11** Mode 1 assigned to the first experimental absorption of PABA. Top: viewed down b axis, middle: down c axis, bottom: down a axis.

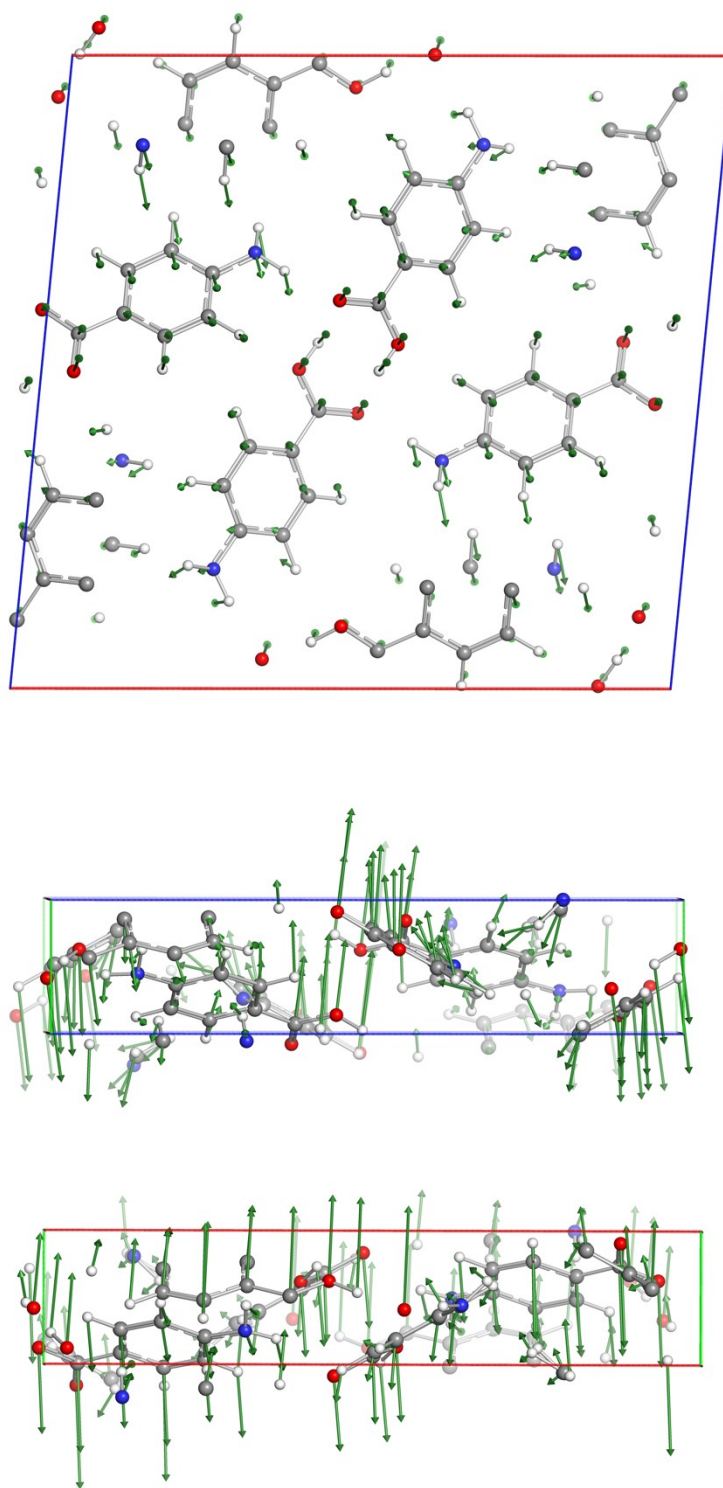

**Fig. S12** Mode 2 (strong) assigned to the second experimental absorption band of PABA. Top: viewed down b axis, middle: down c axis, bottom: down a axis.

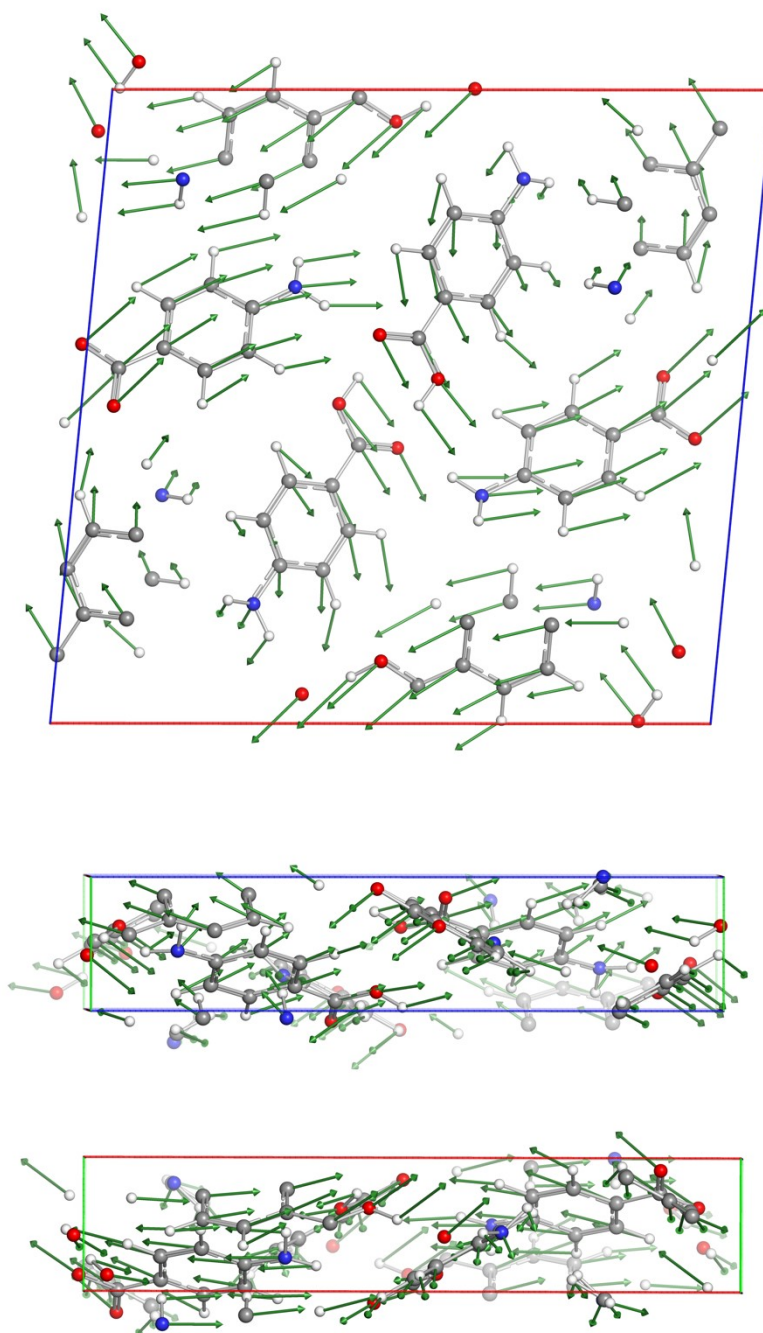

**Fig. S13** Mode 3 (weak) assigned to the second experimental absorption band of PABA. Top: viewed down b axis, middle: down c axis, bottom: down a axis.

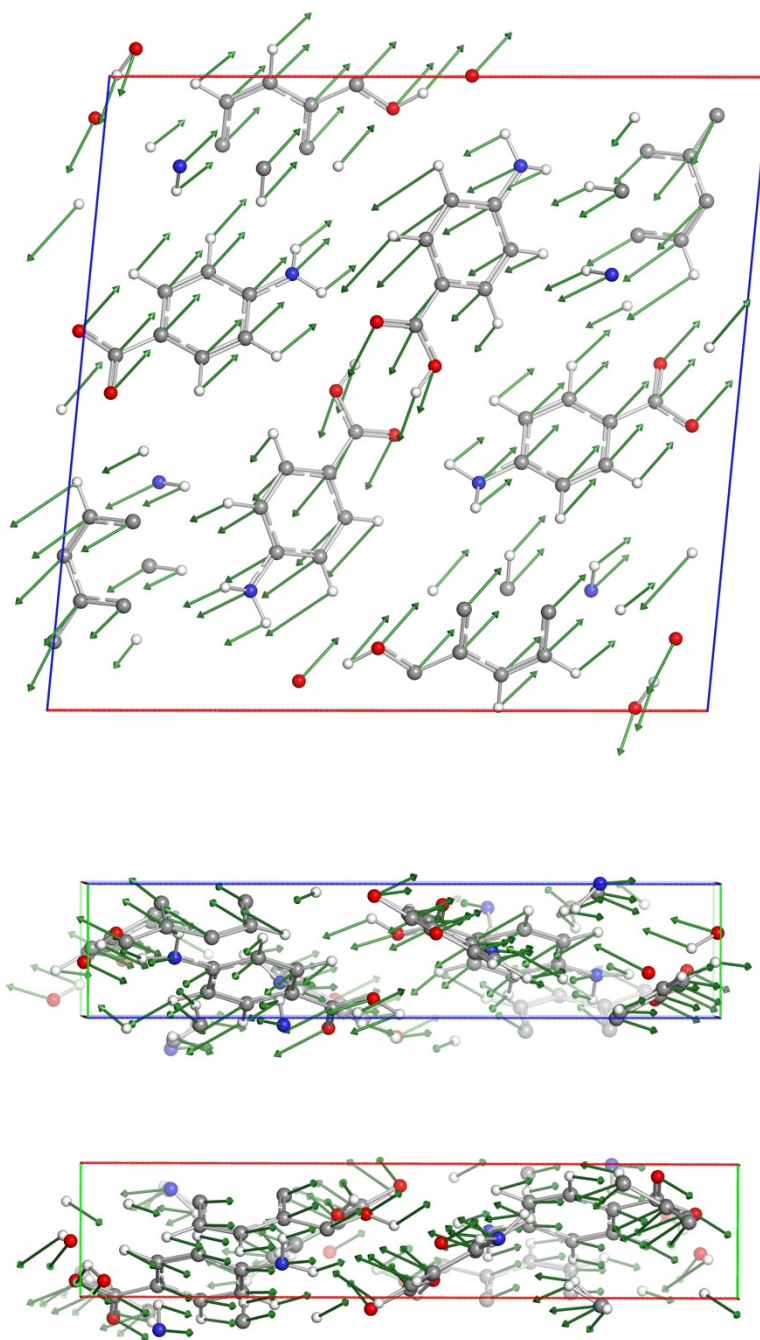

**Fig. S14** Mode 6 assigned to the third experimental absorption of PABA. Top: viewed down b axis, middle: down c axis, bottom: down a axis.

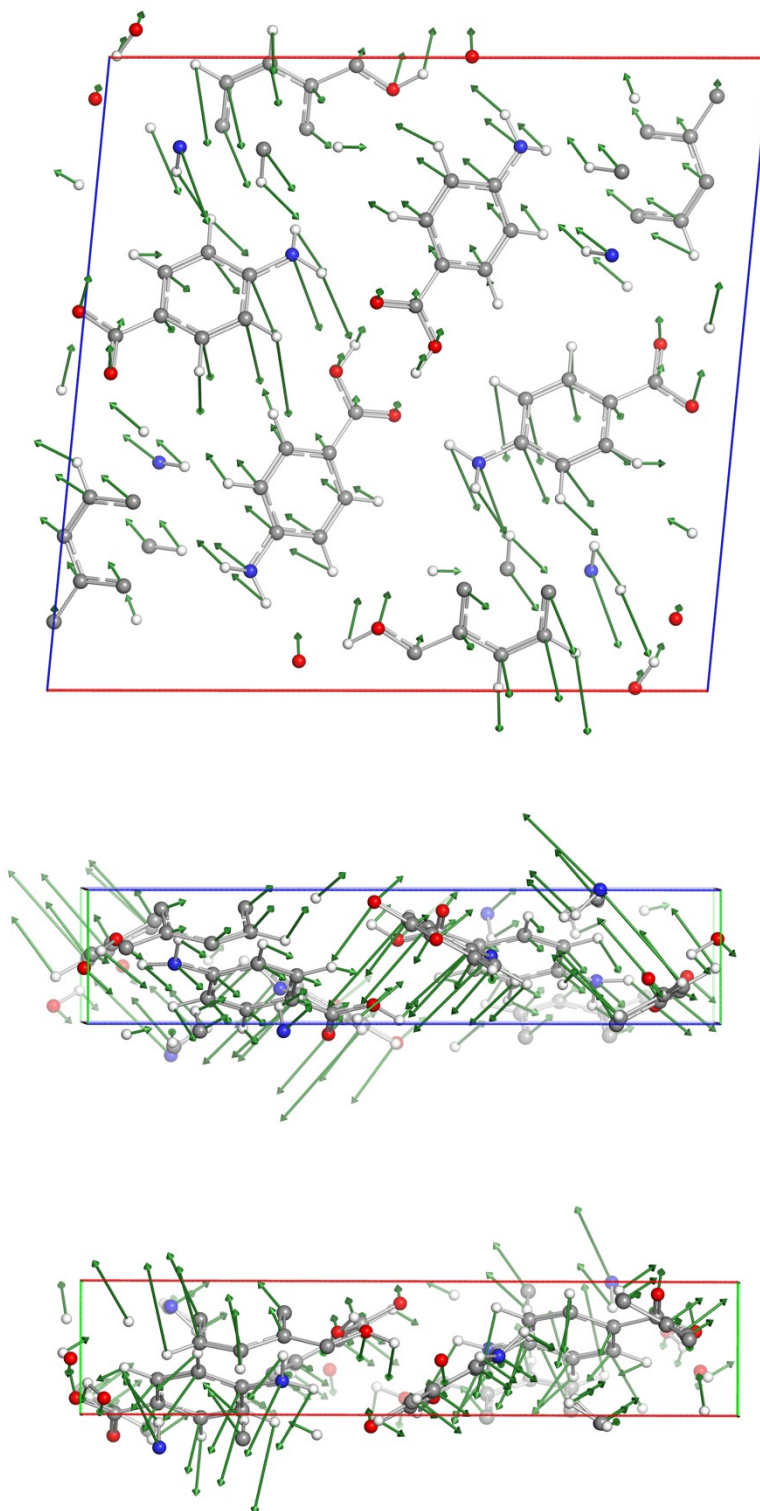

**Fig. S15** Mode 9 assigned to the fourth experimental absorption of PABA using a volume-constrained unit cell. Top: viewed down b axis, middle: down c axis, bottom: down a axis.



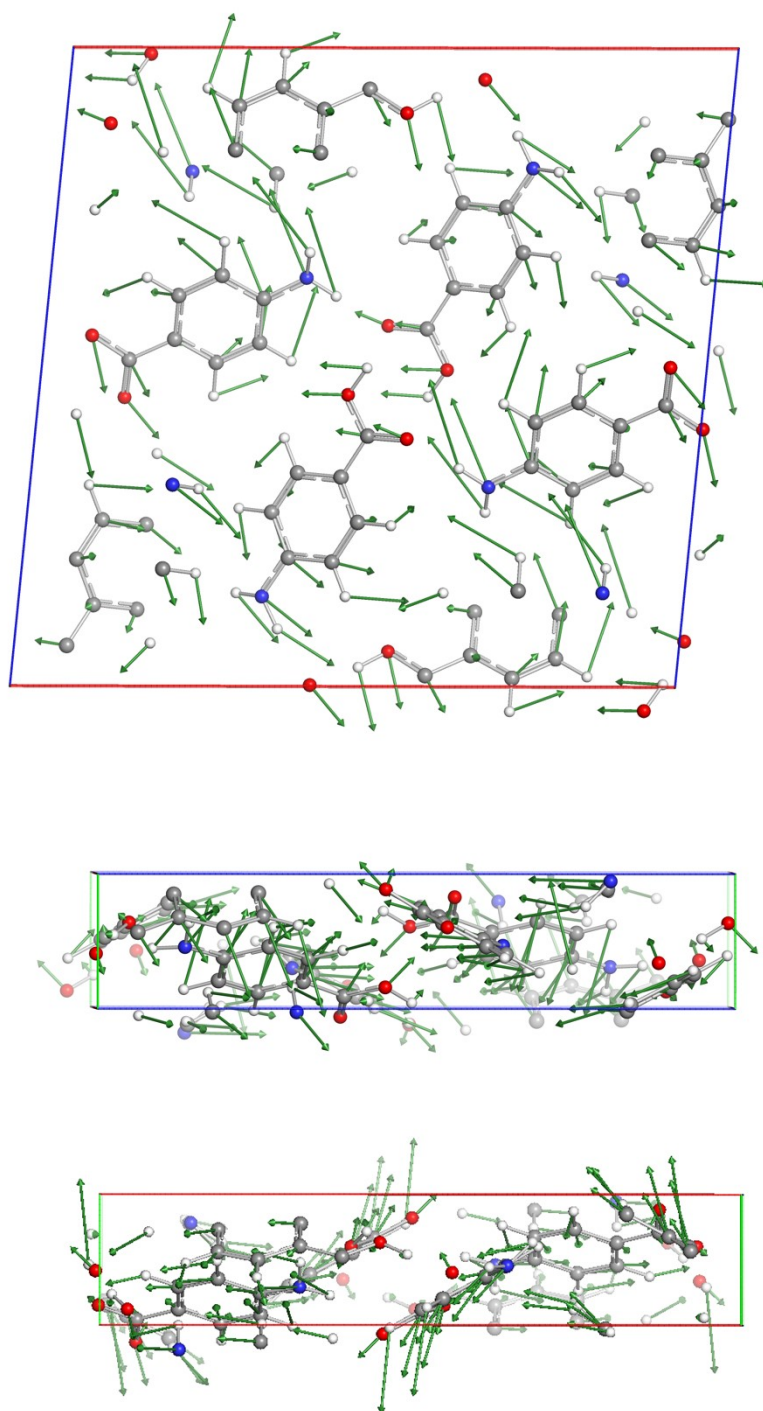

**Fig. S16** Mode 9 assigned to the fourth experimental absorption of PABA using the fully optimised unit cell.

Top: viewed down b axis, middle: down c axis, bottom: down a axis.

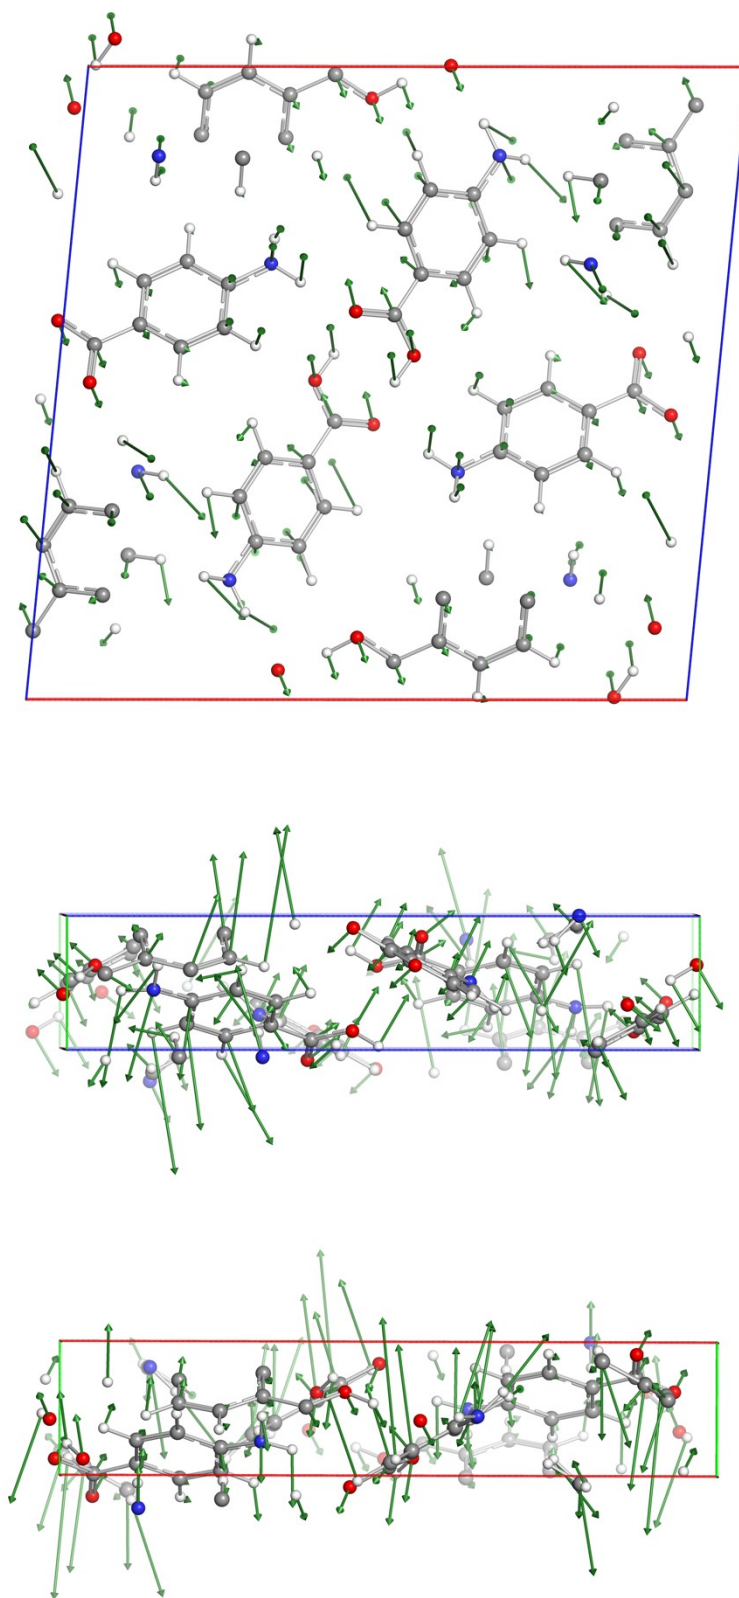

**Fig. S17** Mode 13 assigned to the fifth experimental absorption of PABA. Top: viewed down b axis, middle: down c axis, bottom: down a axis.

## **References**

- 1 S. Gracin and A. Fischer, *Acta Crystallogr. Sect. Sect. E: Struct. Rep. Online*, 2005, **61**, 1242-1244.
- 2 E. R. Brown, J. E. Bjarnason, A. M. Fedor and T. M. Korter, *Appl. Phys. Lett.*, 2007, **90**, 061908.
- 3 Z. Li, Z. Zhang, X. Zhao, H. Su, H. Zhang and J. Lan, *J. Infrared Millim. Terahertz Waves*, 2013, **34**, 617-626.
- 4 I. Wolfram Research, *Mathematica*, Champaign, Illinois, 12.0 edn., 2019.
- 5 Y. Tao, W. Zou, S. Nanayakkara and E. Kraka, *J. Mol. Model.*, 2020, **26**, 290.
